# Supplementary material
Source: PubMed Central journal article supplement (PMC2952719)
Supplement: NIHMS237590-supplement-SI.pdf [file NIHMS237590-supplement-SI.pdf]

## Supporting Information

### One-Pot Etherification of Purine Nucleosides and Pyrimidines

*Hari Prasad Kokatla and Mahesh K. Lakshman\**

Department of Chemistry, The City College and The City University of New York,  
160 Convent Avenue, New York, New York 10031-9198

---

#### Table of Contents

---

| Information                                                                                                                               | Page |
|-------------------------------------------------------------------------------------------------------------------------------------------|------|
| General Experimental Considerations                                                                                                       | S-4  |
| General Procedure for One-Pot Etherification Reactions                                                                                    | S-4  |
| 2',3',5'-Tri- <i>O</i> -( <i>tert</i> -butyldimethylsilyl)- <i>O</i> <sup>6</sup> -methylinosine ( <b>2</b> )                             | S-4  |
| <i>O</i> <sup>6</sup> -(Allyl)-2',3',5'-tri- <i>O</i> -( <i>tert</i> -butyldimethylsilyl)inosine ( <b>4</b> )                             | S-5  |
| 2',3',5'-Tri- <i>O</i> -( <i>tert</i> -butyldimethylsilyl)- <i>O</i> <sup>6</sup> -propargylinosine ( <b>5</b> )                          | S-5  |
| 2',3',5'-Tri- <i>O</i> -( <i>tert</i> -butyldimethylsilyl)- <i>O</i> <sup>6</sup> -isopropylinosine ( <b>6</b> )                          | S-5  |
| 2',3',5'-Tri- <i>O</i> -( <i>tert</i> -butyldimethylsilyl)- <i>O</i> <sup>6</sup> -(2-hydroxyethyl)inosine ( <b>7</b> )                   | S-6  |
| Ethylene glycol bis- <i>O</i> <sup>6</sup> -[9-(2',3',5'-tri- <i>O</i> - <i>tert</i> -butyldimethylsilyl-β-D-ribofuranosyl)]purinyl ether | S-6  |
| 2',3',5'-Tri- <i>O</i> -( <i>tert</i> -butyldimethylsilyl)- <i>O</i> <sup>6</sup> -(4-nitrophenyl)inosine ( <b>8</b> )                    | S-7  |
| 2',3',5'-Tri- <i>O</i> -( <i>tert</i> -butyldimethylsilyl)- <i>O</i> <sup>6</sup> -methylguanosine ( <b>9</b> )                           | S-7  |
| 2',3',5'-Tri- <i>O</i> -( <i>tert</i> -butyldimethylsilyl)- <i>O</i> <sup>6</sup> -(4-methoxyphenyl)guanosine ( <b>10</b> )               | S-7  |
| 3',5'-Di- <i>O</i> -( <i>tert</i> -butyldimethylsilyl)- <i>O</i> <sup>6</sup> -methyl-2'-deoxyguanosine ( <b>11</b> )                     | S-8  |
| 3',5'-Di- <i>O</i> -( <i>tert</i> -butyldimethylsilyl)- <i>O</i> <sup>6</sup> -phenyl-2'-deoxyguanosine ( <b>12</b> )                     | S-8  |
| 4-Methoxyquinazoline ( <b>16a</b> )                                                                                                       | S-8  |
| 4-Ethoxyquinazoline ( <b>16b</b> )                                                                                                        | S-9  |
| 4-Propoxyquinazoline ( <b>16c</b> )                                                                                                       | S-9  |
| 4-Isopropoxyquinazoline ( <b>16d</b> )                                                                                                    | S-9  |
| 2-(4-Quinazolinyloxy)ethanol ( <b>16e</b> )                                                                                               | S-9  |
| 4-(Allyloxy)quinazoline ( <b>16f</b> )                                                                                                    | S-10 |
| 4-(2-Propynyloxy)quinazoline ( <b>16g</b> )                                                                                               | S-10 |
| 4-(Cyclopentyloxy)quinazoline ( <b>16h</b> )                                                                                              | S-10 |
| 4-(Cyclohexyloxy)quinazoline ( <b>16i</b> )                                                                                               | S-10 |
| 4-(Benzyloxy)quinazoline ( <b>16j</b> )                                                                                                   | S-10 |
| 4-(4-Methoxyphenoxy)quinazoline ( <b>16k</b> )                                                                                            | S-11 |
| 2-(Methoxy)-4-methylpyrimidine ( <b>17a</b> )                                                                                             | S-11 |

|                                                                                                                                                                                                       |      |
|-------------------------------------------------------------------------------------------------------------------------------------------------------------------------------------------------------|------|
| 2-(Isopropoxy)-4-methylpyrimidine ( <b>17b</b> )                                                                                                                                                      | S-11 |
| 2-(Allyloxy)-4-methylpyrimidine ( <b>17c</b> )                                                                                                                                                        | S-11 |
| 2-[(4-Methylpyrimidin-2-yl)oxy]ethanol ( <b>17d</b> )                                                                                                                                                 | S-12 |
| 5-Bromo-2-methoxypyrimidine ( <b>18a</b> )                                                                                                                                                            | S-12 |
| 5-Bromo-2-isopropoxypyrimidine ( <b>18b</b> )                                                                                                                                                         | S-12 |
| 2-(Allyloxy)-5-bromopyrimidine ( <b>18c</b> )                                                                                                                                                         | S-12 |
| 2-(5-Bromopyrimidin-2-yloxy)ethanol ( <b>18d</b> )                                                                                                                                                    | S-12 |
| 5-Bromo-2-(4-methoxyphenoxy)pyrimidine ( <b>18e</b> )                                                                                                                                                 | S-13 |
| 500 MHz <sup>1</sup> H NMR spectrum of 2',3',5'-tri- <i>O</i> -( <i>tert</i> -butyldimethylsilyl)- <i>O</i> <sup>6</sup> -methylinosine ( <b>2</b> ) in CDCl <sub>3</sub>                             | S-14 |
| 500 MHz <sup>1</sup> H NMR spectrum of <i>O</i> <sup>6</sup> -(allyl)-2',3',5'-tri- <i>O</i> -( <i>tert</i> -butyldimethylsilyl)inosine ( <b>4</b> ) in CDCl <sub>3</sub>                             | S-14 |
| 500 MHz <sup>1</sup> H NMR spectrum of 2',3',5'-tri- <i>O</i> -( <i>tert</i> -butyldimethylsilyl)- <i>O</i> <sup>6</sup> -propargylinosine ( <b>5</b> ) in CDCl <sub>3</sub>                          | S-15 |
| 500 MHz <sup>1</sup> H NMR spectrum of 2',3',5'-tri- <i>O</i> -( <i>tert</i> -butyldimethylsilyl)- <i>O</i> <sup>6</sup> -isopropylinosine ( <b>6</b> ) in CDCl <sub>3</sub>                          | S-15 |
| 500 MHz <sup>1</sup> H NMR spectrum of 2',3',5'-tri- <i>O</i> -( <i>tert</i> -butyldimethylsilyl)- <i>O</i> <sup>6</sup> -(2-hydroxyethyl)inosine ( <b>7</b> ) in CDCl <sub>3</sub>                   | S-16 |
| 500 MHz <sup>1</sup> H NMR spectrum of ethylene glycol bis- <i>O</i> <sup>6</sup> -[9-(2',3',5'-tri- <i>O</i> - <i>tert</i> -butyldimethylsilyl)-β-D-ribofuranosyl]purinyl ether in CDCl <sub>3</sub> | S-16 |
| 500 MHz <sup>1</sup> H NMR spectrum of 2',3',5'-tri- <i>O</i> -( <i>tert</i> -butyldimethylsilyl)- <i>O</i> <sup>6</sup> -(4-nitrophenyl)inosine ( <b>8</b> ) in CDCl <sub>3</sub>                    | S-17 |
| 500 MHz <sup>1</sup> H NMR spectrum of 2',3',5'-tri- <i>O</i> -( <i>tert</i> -butyldimethylsilyl)- <i>O</i> <sup>6</sup> -methylguanosine ( <b>9</b> ) in CDCl <sub>3</sub>                           | S-17 |
| 500 MHz <sup>1</sup> H NMR spectrum of 2',3',5'-tri- <i>O</i> -( <i>tert</i> -butyldimethylsilyl)- <i>O</i> <sup>6</sup> -(4-methoxyphenyl)guanosine ( <b>10</b> ) in CDCl <sub>3</sub>               | S-18 |
| 500 MHz <sup>1</sup> H NMR spectrum of 3',5'-di- <i>O</i> -( <i>tert</i> -butyldimethylsilyl)- <i>O</i> <sup>6</sup> -methyl-2'-deoxyguanosine ( <b>11</b> ) in CDCl <sub>3</sub>                     | S-18 |
| 500 MHz <sup>1</sup> H NMR spectrum of 3',5'-di- <i>O</i> -( <i>tert</i> -butyldimethylsilyl)- <i>O</i> <sup>6</sup> -phenyl-2'-deoxyguanosine ( <b>12</b> ) in CDCl <sub>3</sub>                     | S-19 |
| 500 MHz <sup>1</sup> H NMR spectrum of 4-methoxyquinazoline ( <b>16a</b> ) in CDCl <sub>3</sub>                                                                                                       | S-19 |
| 500 MHz <sup>1</sup> H NMR spectrum of 4-ethoxyquinazoline ( <b>16b</b> ) in CDCl <sub>3</sub>                                                                                                        | S-20 |
| 500 MHz <sup>1</sup> H NMR spectrum of 4-propoxyquinazoline ( <b>16c</b> ) in CDCl <sub>3</sub>                                                                                                       | S-20 |
| 500 MHz <sup>1</sup> H NMR spectrum of 4-isopropoxyquinazoline ( <b>16d</b> ) in CDCl <sub>3</sub>                                                                                                    | S-21 |
| 500 MHz <sup>1</sup> H NMR spectrum of 2-(4-quinazolinyloxy)ethanol ( <b>16e</b> ) in CDCl <sub>3</sub>                                                                                               | S-21 |
| 500 MHz <sup>1</sup> H NMR spectrum of 4-(allyloxy)quinazoline ( <b>16f</b> ) in CDCl <sub>3</sub>                                                                                                    | S-22 |
| 500 MHz <sup>1</sup> H NMR spectrum of 4-(2-propynyloxy)quinazoline ( <b>16g</b> ) in CDCl <sub>3</sub>                                                                                               | S-22 |
| 500 MHz <sup>1</sup> H NMR spectrum of 4-(cyclopentyloxy)quinazoline ( <b>16h</b> ) in CDCl <sub>3</sub>                                                                                              | S-23 |

|                                                                                                                                                                                                      |      |
|------------------------------------------------------------------------------------------------------------------------------------------------------------------------------------------------------|------|
| 500 MHz <sup>1</sup> H NMR spectrum of 4-(cyclohexyloxy)quinazoline ( <b>16i</b> ) in CDCl <sub>3</sub>                                                                                              | S-23 |
| 500 MHz <sup>1</sup> H NMR spectrum of 4-(benzyloxy)quinazoline ( <b>16j</b> ) in CDCl <sub>3</sub>                                                                                                  | S-24 |
| 500 MHz <sup>1</sup> H NMR spectrum of 4-(4-methoxyphenoxy)quinazoline ( <b>16k</b> ) in CDCl <sub>3</sub>                                                                                           | S-24 |
| 500 MHz <sup>1</sup> H NMR spectrum of 2-(methoxy)-4-methylpyrimidine ( <b>17a</b> ) in CDCl <sub>3</sub>                                                                                            | S-25 |
| 500 MHz <sup>1</sup> H NMR spectrum of 2-(isopropoxy)-4-methylpyrimidine ( <b>17b</b> ) in CDCl <sub>3</sub>                                                                                         | S-25 |
| 500 MHz <sup>1</sup> H NMR spectrum of 2-(allyloxy)-4-methylpyrimidine ( <b>17c</b> ) in CDCl <sub>3</sub>                                                                                           | S-26 |
| 500 MHz <sup>1</sup> H NMR spectrum of 2-[(4-methylpyrimidin-2-yl)oxy]ethanol ( <b>17d</b> ) in CDCl <sub>3</sub>                                                                                    | S-26 |
| 500 MHz <sup>1</sup> H NMR spectrum of 5-bromo-2-methoxypyrimidine ( <b>18a</b> ) in CDCl <sub>3</sub>                                                                                               | S-27 |
| 500 MHz <sup>1</sup> H NMR spectrum of 5-bromo-2-isopropoxypyrimidine ( <b>18b</b> ) in CDCl <sub>3</sub>                                                                                            | S-27 |
| 500 MHz <sup>1</sup> H NMR spectrum of 2-(allyloxy)-5-bromopyrimidine ( <b>18c</b> ) in CDCl <sub>3</sub>                                                                                            | S-28 |
| 500 MHz <sup>1</sup> H NMR spectrum of 2-(5-bromopyrimidin-2-yloxy)ethanol ( <b>18d</b> ) in CDCl <sub>3</sub>                                                                                       | S-28 |
| 500 MHz <sup>1</sup> H NMR spectrum of 5-bromo-2-(4-methoxyphenoxy)pyrimidine ( <b>18e</b> ) in CDCl <sub>3</sub>                                                                                    | S-29 |
| 500 MHz <sup>1</sup> H- <sup>1</sup> H COSY spectrum of 2',3',5'-tri- <i>O</i> -( <i>tert</i> -butyldimethylsilyl)- <i>O</i> <sup>6</sup> -(4-nitrophenyl)-inosine ( <b>8</b> ) in CDCl <sub>3</sub> | S-30 |
| 500 MHz <sup>1</sup> H- <sup>1</sup> H COSY spectrum of 2',3',5'-tri- <i>O</i> -( <i>tert</i> -butyldimethylsilyl)- <i>O</i> <sup>6</sup> -methyl-guanosine ( <b>9</b> ) in CDCl <sub>3</sub>        | S-31 |
| 500 MHz <sup>1</sup> H- <sup>1</sup> H COSY spectrum of 3',5'-di- <i>O</i> -( <i>tert</i> -butyldimethylsilyl)- <i>O</i> <sup>6</sup> -methyl-2'-deoxy-guanosine ( <b>11</b> ) in CDCl <sub>3</sub>  | S-32 |
| References                                                                                                                                                                                           | S-33 |

---

## General Experimental Considerations

Thin layer chromatography was performed on 250  $\mu\text{m}$  silica plates and column chromatographic purifications were performed on 200–300 mesh silica gel. THF was distilled over  $\text{LiAlH}_4$  and then over Na, MeCN was distilled over  $\text{CaH}_2$ . All other reagents were obtained from commercial sources and were used without further purification.  $^1\text{H}$  NMR spectra were recorded at 500 MHz in  $\text{CDCl}_3$  and are referenced to the residual protonated solvent resonance.  $^{13}\text{C}$  NMR spectra were recorded at 125 MHz in  $\text{CDCl}_3$  and are referenced to the solvent resonance. Chemical shifts ( $\delta$ ) are reported in parts per million (ppm) and coupling constants ( $J$ ) are in hertz (Hz).

## General Procedure for the One-Pot Etherification Reactions

To a solution of the substrate (0.16 mmol of protected inosine or 79  $\mu\text{mol}$  of protected guanosine or 0.10 mmol of protected 2'-deoxyguanosine or 0.68 mmol of either quinazolin-4(3*H*)-one or 4-methylpyrimidin-2(1*H*)-one•HCl or 0.57 mmol of 5-bromopyrimidin-2(1*H*)-one) in dry THF (2 mL) were added 2 molar equiv each of BOP and  $\text{Cs}_2\text{CO}_3$  under a nitrogen atmosphere. The mixture was stirred at room temperature (10 min for inosine, 1 h for guanosine and 2'-deoxyguanosine, 50 min for pyrimidinones).

*For reactions with alcohols:* the resulting mixture was evaporated under reduced pressure, 2 molar equiv of  $\text{Cs}_2\text{CO}_3$  and 20 molar equiv of alcohol were added.

*For reactions with phenols:* 2 molar equiv of  $\text{Cs}_2\text{CO}_3$ , and 2 molar equiv of the phenol were added without evaporation of the mixture.

In each case, the mixture was allowed to stir at the appropriate temperature (indicated in Tables 1 and 2), until TLC indicated complete reaction. The reaction mixture was diluted with water (10 mL) and extracted with EtOAc (3 x 10 mL). The organic layer was dried over  $\text{Na}_2\text{SO}_4$  and concentrated under reduced pressure. The crude products were purified by column chromatography on silica gel using the solvent indicated under each compound heading. Any deviation from the general procedure is described under the specific compound heading.

### 2',3',5'-Tri-*O*-(*tert*-butyldimethylsilyl)-*O*<sup>6</sup>-methylinosine (2).

Purification using 20% EtOAc in hexanes gave 96 mg (94%) of **2** as a yellowish solid.  $R_f$  ( $\text{SiO}_2$ /20% EtOAc in hexanes) = 0.4.  $^1\text{H}$  NMR:  $\delta$  8.52 (s, 1H, Ar-H), 8.32 (s, 1H, Ar-H), 6.08 (d, 1H, H-1',  $J = 4.8$  Hz), 4.62 (t, 1H, H-2',  $J = 4.6$  Hz), 4.31 (t, 1H, H-3',  $J = 4.1$  Hz), 4.18 (s, 3H,

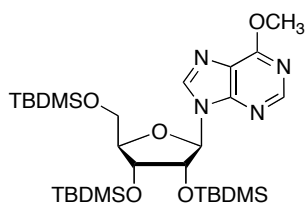

OCH<sub>3</sub>), 4.13 (q, 1H, H-4',  $J = 3.1$  Hz), 4.03 (dd, 1H, H-5',  $J = 3.9$ , 11.2 Hz), 3.79 (dd, 1H, H-5',  $J = 2.6$ , 11.2 Hz), 0.95, 0.93, and 0.75 (3s, 27H, *tert*-Bu), 0.14, 0.13, 0.10, 0.09, -0.04, and -0.22 (6s, 18H, SiCH<sub>3</sub>). <sup>13</sup>C NMR:  $\delta$  161.2, 152.2, 151.9, 141.3, 122.2, 88.6, 85.6, 76.3, 72.1, 62.7, 54.3, 26.3, 26.0, 25.8, 18.7, 18.3, 18.0, -4.1, -4.4, -4.8, -5.1. HRMS (ESI) calcd for C<sub>29</sub>H<sub>57</sub>N<sub>4</sub>O<sub>5</sub>Si<sub>3</sub> [M + H]<sup>+</sup> 625.3631, found 625.3636.

#### ***O*<sup>6</sup>-(Allyl)-2',3',5'-tri-*O*-(*tert*-butyldimethylsilyl)inosine (4).**

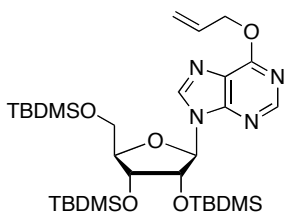

Purification using 20% EtOAc in hexanes gave 96 mg (90%) of **4** as a white solid.  $R_f$  (SiO<sub>2</sub>/30% EtOAc in hexanes) = 0.7. <sup>1</sup>H NMR:  $\delta$  8.50 (s, 1H, Ar-H), 8.30 (s, 1H, Ar-H), 6.17 (m, 1H, -CH=), 6.08 (d, 1H, H-1',  $J = 4.8$  Hz) 5.45 (d, 1H, =CH<sub>trans</sub>,  $J = 17.0$  Hz) 5.29 (d, 1H, =CH<sub>cis</sub>,  $J = 10.2$  Hz), 5.15 (br d, 2H, OCH<sub>2</sub>,  $J = 5.8$  Hz), 4.63 (t, 1H, H-2',  $J = 8.3$  Hz), 4.31 (t, 1H, H-3',  $J = 3.4$  Hz), 4.13 (br d, 1H, H-4',  $J = 2.4$  Hz), 4.02 (dd, 1H, H-5',  $J = 3.4$ , 11.2 Hz), 3.79 (d, 1H, H-5',  $J = 11.2$  Hz), 0.95, 0.93, and 0.78 (3s, 27H, *tert*-Bu), 0.14, 0.13, 0.10, 0.09, -0.04, and -0.23 (6s, 18H, SiCH<sub>3</sub>). <sup>13</sup>C NMR:  $\delta$  160.5, 152.1, 141.3, 132.6, 122.1, 118.7, 88.5, 85.7, 76.3, 72.1, 67.7, 62.7, 26.3, 26.0, 25.8, 18.7, 18.3, 18.0, -4.1, -4.4, -4.8, -5.1. HRMS (ESI) calcd for C<sub>31</sub>H<sub>59</sub>N<sub>4</sub>O<sub>5</sub>Si<sub>3</sub> [M + H]<sup>+</sup> 651.3788, found 651.3787.

#### **2',3',5'-Tri-*O*-(*tert*-butyldimethylsilyl)-*O*<sup>6</sup>-propargylinosine (5).**

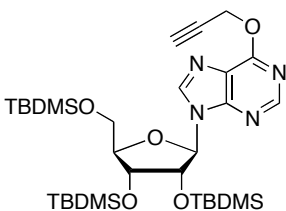

Purification using 20% EtOAc in hexanes gave 91 (86%) mg of **5** as a white solid.  $R_f$  (SiO<sub>2</sub>/30% EtOAc in hexanes) = 0.7. <sup>1</sup>H NMR:  $\delta$  8.54 (s, 1H, Ar-H), 8.36 (s, 1H, Ar-H), 6.08 (d, 1H, H-1',  $J = 4.8$  Hz), 5.23 (dd, 2H, OCH<sub>2</sub>,  $J = 1.4$ , 2.4 Hz), 4.59 (t, 1H, H-2',  $J = 4.4$  Hz), 4.32 (t, 1H, H-3',  $J = 4.1$  Hz), 4.13 (q, 1H, H-4',  $J = 3.4$  Hz), 4.00 (dd, 1H, H-5',  $J = 3.6$ , 11.4 Hz), 3.79 (dd, 1H, H-5',  $J = 2.4$ , 11.7 Hz), 2.49 (t, 1H, ≡C-H,  $J = 2.4$  Hz), 0.95, 0.92, and 0.79 (3s, 27H, *tert*-Bu), 0.14, 0.13, 0.10, 0.09, -0.04, and -0.21 (6s, 18H, SiCH<sub>3</sub>). <sup>13</sup>C NMR:  $\delta$  159.5, 152.3, 151.9, 141.7, 122.1, 88.7, 85.6, 78.3, 76.4, 75.3, 71.9, 62.6, 54.3, 26.3, 26.0, 25.8, 18.7, 18.2, 18.0, -4.1, -4.5, -4.7, -5.1. HRMS (ESI) calcd for C<sub>31</sub>H<sub>57</sub>N<sub>4</sub>O<sub>5</sub>Si<sub>3</sub> [M + H]<sup>+</sup> 649.3631, found 649.3634.

#### **2',3',5'-Tri-*O*-(*tert*-butyldimethylsilyl)-*O*<sup>6</sup>-isopropylinosine (6).<sup>1</sup>**

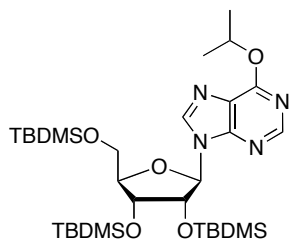

Purification 15% EtOAc in hexanes gave 80 mg (75%) of **6** as a clear gummy material.  $R_f$  (SiO<sub>2</sub>/30% EtOAc in hexanes) = 0.7. <sup>1</sup>H NMR: δ 8.48 (s, 1H, Ar-H), 8.26 (s, 1H, Ar-H), 6.08 (d, 1H, H-1',  $J$  = 4.8 Hz), 5.66 (septet, 1H, OCH,  $J$  = 6.3 Hz), 4.63 (t, 1H, H-2',  $J$  = 4.6 Hz), 4.31 (t, 1H, H-3',  $J$  = 3.6 Hz), 4.12 (br d, 1H, H-4',  $J$  = 2.4 Hz), 4.01 (dd, 1H, H-5',  $J$  = 3.6, 11.4 Hz), 3.79 (dd, 1H, H-5',  $J$  = 1.9, 11.2 Hz), 1.47 (d, 6H, (CH<sub>3</sub>)<sub>2</sub>,  $J$  = 6.3 Hz), 0.94, 0.92, and 0.78 (3s, 27H, *tert*-Bu), 0.13, 0.12, 0.10, 0.09, -0.04, -0.22 (6s, 18H, SiCH<sub>3</sub>). <sup>13</sup>C NMR: δ 160.7, 152.2, 152.1, 141.0, 122.3, 88.5, 85.6, 76.2, 72.1, 70.4, 62.7, 26.3, 26.0, 25.8, 22.1, 18.7, 18.3, 18.0, -4.1, -4.4, -4.8, -5.1.

### 2',3',5'-Tri-*O*-(*tert*-butyldimethylsilyl)-*O*<sup>6</sup>-(2-hydroxyethyl)inosine (**7**).

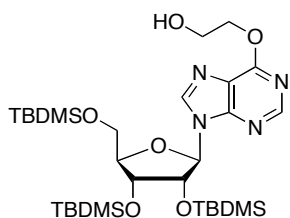

Purification using 70% EtOAc in hexanes gave 68 mg (63%) of **7** as a white solid.  $R_f$  (SiO<sub>2</sub>/EtOAc) = 0.3. <sup>1</sup>H NMR: δ 8.49 (s, 1H, Ar-H), 8.35 (s, 1H, Ar-H), 6.87 (d, 1H, H-1',  $J$  = 4.4 Hz), 4.72 (m, 2H, OCH<sub>2</sub>), 4.61 (t, 1H, H-2',  $J$  = 4.4 Hz), 4.31 (m, 1H, H-3'), 4.13 (br s, 1H, H-4'), 4.02 (m, 3H, H-5' and OCH<sub>2</sub>), 3.79 (d, 1H, H-5',  $J$  = 11.2 Hz), 3.52 (s, 1H, OH), 0.95, 0.92 and, 0.79 (3s, 27H, *tert*-Bu), 0.14, 0.13, 0.09, 0.08, -0.04, -0.22 (6s, 18H, SiCH<sub>3</sub>). <sup>13</sup>C NMR: δ 160.8 152.2, 152.0, 141.6, 122.0, 88.6, 85.7, 76.4, 72.0, 69.8, 62.6, 61.9, 26.3, 26.0, 25.8, 18.7, 18.2, 18.0, -4.1, -4.5, -4.8, -5.1. HRMS (ESI) calcd for C<sub>30</sub>H<sub>59</sub>N<sub>4</sub>O<sub>6</sub>Si<sub>3</sub> [M + H]<sup>+</sup> 655.3737, found 655.3739.

### Ethylene glycol bis-*O*<sup>6</sup>-[9-(2',3',5'-tri-*O*-*tert*-butyldimethylsilyl-β-D-ribofuranosyl)]purinyl ether.

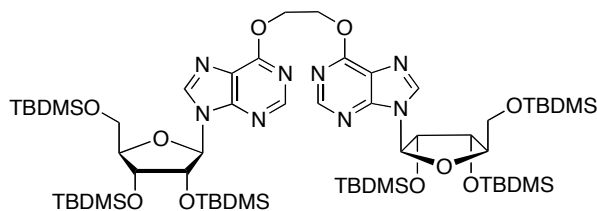

Minor product obtained as a white solid (32 mg, 15%) in the reaction of **3** with ethylene glycol.  $R_f$  (SiO<sub>2</sub>/20% EtOAc in hexanes) = 0.4. <sup>1</sup>H NMR: δ 8.49 (s, 2H, Ar-H), 8.29 (s, 2H, Ar-H), 6.09 (d, 2H, H-1',  $J$  = 4.8 Hz), 5.06 (m, 4H, OCH<sub>2</sub>), 4.61 (t, 2H, H-2',  $J$  = 4.4 Hz), 4.31 (t, 2H, H-3',  $J$  = 2.9 Hz), 4.13 (br d, 2H, H-4',  $J$  = 2.4 Hz), 4.02 (dd, 2H, H-5',  $J$  = 3.4, 11.2), 3.79 (d, 2H, H-5',  $J$  = 11.7 Hz), 0.94, 0.92, and 0.79 (3s, 54H, *tert*-Bu), 0.13, 0.12, 0.10, 0.09, -0.04, -0.22 (6s, 36H, SiCH<sub>3</sub>). <sup>13</sup>C NMR: δ 160.5, 152.2,

152.0, 141.3, 122.0, 88.6, 85.7, 76.3, 72.1, 64.9, 62.7, 26.3, 26.0, 25.9, 18.7, 18.3, 18.0, -4.1, -4.5, -4.7, -5.1. HRMS (ESI) calcd for  $C_{58}H_{111}N_8O_{10}Si_6$   $[M + H]^+$  1247.7033, found 1247.7032.

### 2',3',5'-Tri-*O*-(*tert*-butyldimethylsilyl)-*O*<sup>6</sup>-(4-nitrophenyl)inosine (**8**).<sup>1</sup>

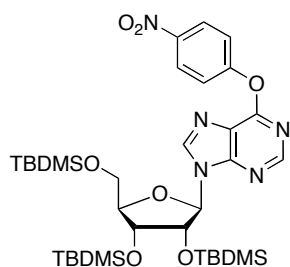

Purification using 20% EtOAc in hexanes gave 102 mg (85%) of **8** as a white solid.  $R_f$  (SiO<sub>2</sub>/20% EtOAc in hexanes) = 0.5. <sup>1</sup>H NMR:  $\delta$  8.52 (s, 1H, Ar-H), 8.50 (s, 1H, Ar-H), 8.33 (d, 2H, Ar-H,  $J$  = 8.7 Hz), 7.47 (d, 2H, Ar-H,  $J$  = 8.7 Hz), 6.14 (d, 1H, H-1',  $J$  = 4.7 Hz), 4.60 (t, 1H, H-2',  $J$  = 4.4 Hz), 4.33 (t, 1H, H-3',  $J$  = 3.9 Hz), 4.17 (m, 1H, H-4'), 4.04 (dd, 1H, H-5',  $J$  = 3.3, 11.4), 3.82 (d, 1H, H-5',  $J$  = 11.3 Hz), 0.97, 0.93, and 0.81 (3s, 27H, *tert*-Bu), 0.16, 0.15, 0.11, 0.10, -0.01, and -0.18 (6s, 18H, SiCH<sub>3</sub>). <sup>13</sup>C NMR:  $\delta$  159.0, 157.5, 153.5, 151.9, 145.3, 143.0, 125.6, 122.6, 122.3, 88.8, 85.7, 76.6, 71.9, 62.5, 26.3, 26.0, 25.8, 18.7, 18.2, 18.0, -4.1, -4.4, -4.7, -5.1. (The structure of this compound shown on the <sup>1</sup>H NMR spectrum in the Supporting Information to ref 1 contains a typographical error. It should have an O atom in place of the NH).

### 2',3',5'-Tri-*O*-(*tert*-butyldimethylsilyl)-*O*<sup>6</sup>-methylguanosine (**9**).<sup>2</sup>

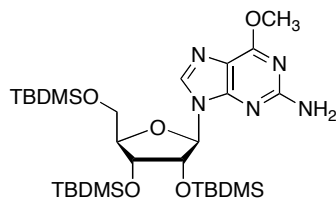

Purification using 20% EtOAc in hexanes gave 37 mg (73%) of **9** as an orange solid.  $R_f$  (SiO<sub>2</sub>/20% EtOAc in hexanes) = 0.3. <sup>1</sup>H NMR:  $\delta$  7.97 (s, 1H, Ar-H), 5.91 (d, 1H, H-1',  $J$  = 5.3 Hz), 5.12 (s, 2H, NH<sub>2</sub>), 4.46 (t, 1H, H-2',  $J$  = 4.9 Hz), 4.26 (t, 1H, H-3',  $J$  = 4.3 Hz), 4.08 (m, 1H, H-4'), 4.04 (s, 3H, OCH<sub>3</sub>), 3.96 (dd, 1H, H-5',  $J$  = 3.9, 11.2 Hz), 3.76 (dd, 1H, H-5',  $J$  = 2.4, 11.2 Hz), 0.94, 0.92, and 0.79 (s, 27H, *tert*-Bu), 0.13, 0.12, 0.11, 0.09, -0.04, and -0.18 (6s, 18H, SiCH<sub>3</sub>). <sup>13</sup>C NMR:  $\delta$  161.6, 159.5, 153.8, 137.9, 116.0, 87.7, 85.4, 76.4, 72.2, 62.8, 53.9, 26.2, 26.0, 25.9, 18.7, 18.2, 18.1, -4.1, -4.5, -4.8, -5.2.

### 2',3',5'-Tri-*O*-(*tert*-butyldimethylsilyl)-*O*<sup>6</sup>-(4-methoxyphenyl)guanosine (**10**).

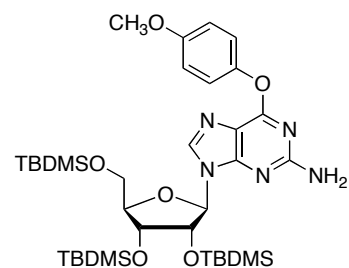

Purification using 20% EtOAc in hexanes gave 44 mg (75%) of **10** as a white solid.  $R_f$  (SiO<sub>2</sub>/20% EtOAc in hexanes) = 0.4. <sup>1</sup>H NMR:  $\delta$  8.08 (s, 1H, Ar-H), 7.16 (d, 2H, Ar-H,  $J$  = 8.8 Hz), 6.91 (d, 2H, Ar-H,  $J$  = 8.8 Hz), 5.92 (d, 1H, H-1',  $J$  = 4.5 Hz), 4.79 (s, 2H, NH<sub>2</sub>), 4.51 (t, 1H, H-2',  $J$  = 4.4 Hz), 4.31 (t, 1H, H-3',  $J$  = 4.0 Hz), 4.16 (m, 1H, H-4'), 3.99 (dd, 1H, H-5',  $J$  = 3.5, 11.4 Hz), 3.82 (s, 3H, OCH<sub>3</sub>), 3.79 (dd, 1H, H-

5',  $J = 1.9, 11.4$  Hz), 0.95, 0.92, and 0.83 (3s, 27H, *tert*-Bu), 0.14, 0.13, 0.10, 0.09, 0.00, and -0.10 (6s, 18H, SiCH<sub>3</sub>). <sup>13</sup>C NMR:  $\delta$  160.9, 159.3, 157.0, 154.7, 146.2, 138.9, 122.9, 116.1, 114.4, 88.2, 85.1, 76.3, 71.9, 62.6, 55.7, 26.3, 26.0, 25.9, 18.7, 18.7, 18.2, 18.1, -4.1, -4.4, -4.6, -5.1. HRMS (ESI) calcd for C<sub>35</sub>H<sub>62</sub>N<sub>5</sub>O<sub>6</sub>Si<sub>3</sub> [M + H]<sup>+</sup> 732.4002, found 732.4007.

### 3',5'-Di-*O*-(*tert*-butyldimethylsilyl)-*O*<sup>6</sup>-methyl-2'-deoxyguanosine (**11**).<sup>2</sup>

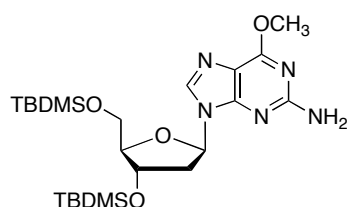

Purification using 20% EtOAc in hexanes gave 38 mg (75%) of **11** as a yellowish solid (from 0.1 mmol of 3',5'-di-*O*-TBDMS 2'-deoxyguanosine).  $R_f$  (SiO<sub>2</sub>/40% EtOAc in hexanes) = 0.3. <sup>1</sup>H NMR:  $\delta$  7.70 (s, 1H, Ar-H), 6.31 (t, 1H, H-1',  $J = 6.3$  Hz), 4.89 (s, 2H, NH<sub>2</sub>), 4.57 (m, 1H, H-3'), 4.05 (s, 3H, OCH<sub>3</sub>), 3.89 (m, 1H, H-4'), 3.80 (dd, 1H, H-5',  $J = 4.4, 11.2$  Hz), 3.74 (dd, 1H, H-5',  $J = 2.9, 11.2$  Hz), 2.55 (app quint, 1H, H-2',  $J_{app} \sim 6.3$  Hz), 2.34 (ddd, 1H, H-2',  $J = 2.2, 6.0, 13.1$  Hz), 0.90 (br s, 18H, *tert*-Bu), 0.08, 0.07, and 0.06 (3s, 12H, SiCH<sub>3</sub>). <sup>13</sup>C NMR:  $\delta$  161.7, 159.5, 153.6, 137.7, 116.1, 87.8, 83.7, 72.0, 63.0, 53.9, 41.1, 26.1, 25.9, 18.6, 18.1, -4.4, -4.5, -5.2, -5.3.

### 3',5'-Di-*O*-(*tert*-butyldimethylsilyl)-*O*<sup>6</sup>-phenyl-2'-deoxyguanosine (**12**).<sup>2</sup>

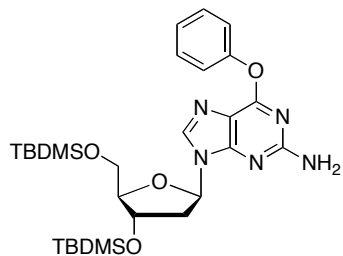

Purification using 20% EtOAc in hexanes gave 42 mg (73%) of **12** as a yellowish solid (from 0.1 mmol of 3',5'-di-*O*-TBDMS 2'-deoxyguanosine).  $R_f$  (SiO<sub>2</sub>/40% EtOAc in hexanes) = 0.3. <sup>1</sup>H NMR:  $\delta$  8.00 (s, 1H, Ar-H), 7.40 (t, 2H, Ar-H,  $J = 7.7$  Hz), 7.25 (m, 3H, Ar-H), 6.34 (t, 1H, H-1',  $J = 6.4$  Hz), 4.77 (s, 2H, NH<sub>2</sub>), 4.60 (m, 1H, H-3'), 3.99 (m, 1H, H-4'), 3.83 (dd, 1H, H-5',  $J = 4.1, 11.1$  Hz), 3.77 (dd, 1H, H-5',  $J = 2.6, 11.1$  Hz), 2.59 (app quint, 1H, H-2',  $J_{app} \sim 6.4$  Hz), 2.37 (ddd, 1H, H-2',  $J = 1.4, 5.8, 12.9$  Hz), 0.923 and 0.920 (2s, 18H, *tert*-Bu), 0.10 and 0.09 (2s, 12H, SiCH<sub>3</sub>). <sup>13</sup>C NMR:  $\delta$  160.6, 159.3, 154.7, 152.7, 138.7, 129.4, 125.4, 122.1, 116.2, 87.9, 83.9, 72.1, 63.0, 41.2, 26.1, 25.9, 18.6, 18.2, -4.4, -4.5, -5.1, -5.2.

### 4-Methoxyquinazoline (**16a**).<sup>3,4</sup>

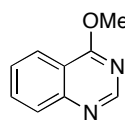

Purification using 15% EtOAc in hexanes gave 89 mg (81%) of **16a** as a colorless oil (solidifies at 0 °C).  $R_f$  (SiO<sub>2</sub>/20% EtOAc in hexanes) = 0.4. <sup>1</sup>H NMR:  $\delta$  8.77 (s, 1H, Ar-H), 8.10 (d, 1H, Ar-H,  $J = 8.3$  Hz), 7.89 (d, 1H, Ar-H,  $J = 8.5$  Hz), 7.77 (dt, 1H,



Ar-H,  $J = 1.3, 8.3$  Hz), 7.50 (t, 1H, Ar-H,  $J = 7.8$  Hz), 4.13 (s, 3H, OCH<sub>3</sub>). <sup>13</sup>C NMR:  $\delta$  167.2, 154.5, 151.0, 133.6, 127.8, 127.1, 123.6, 116.7, 54.4.

#### 4-Ethoxyquinazoline (16b).<sup>4</sup>

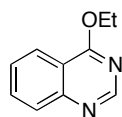

Purification using 15% EtOAc in hexanes gave 92 mg (77%) of **16b** as a colorless oil (solidifies at 0 °C).  $R_f$  (SiO<sub>2</sub>/20% EtOAc in hexanes) = 0.4. <sup>1</sup>H NMR:  $\delta$  8.79 (s, 1H, Ar-H), 8.18 (d, 1H, Ar-H,  $J = 8.3$  Hz), 7.92 (d, 1H, Ar-H,  $J = 8.3$  Hz), 7.82 (t, 1H, Ar-H,  $J = 7.3$  Hz), 7.55 (t, 1H, Ar-H,  $J = 7.5$  Hz), 4.64 (q, 2H, OCH<sub>2</sub>,  $J = 7.3$  Hz), 1.52 (t, 3H, CH<sub>3</sub>,  $J = 7.3$  Hz). <sup>13</sup>C NMR:  $\delta$  166.9, 154.6, 151.1, 133.6, 127.8, 127.0, 123.7, 116.9, 63.2, 14.5.

#### 4-Propoxyquinazoline (16c).<sup>4</sup>

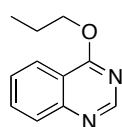

Purification using 15% EtOAc in hexanes gave 101 mg (78%) of **16c** as a colorless oil.  $R_f$  (SiO<sub>2</sub>/30% EtOAc in hexanes) = 0.5. <sup>1</sup>H NMR:  $\delta$  8.78 (s, 1H, Ar-H), 8.17 (d, 1H, Ar-H,  $J = 8.3$  Hz), 7.91 (d, 1H, Ar-H,  $J = 8.3$  Hz), 7.81 (dt, 1H, Ar-H,  $J = 1.4, 7.6$  Hz), 7.54 (t, 1H, Ar-H,  $J = 7.5$  Hz), 4.52 (t, 2H, OCH<sub>2</sub>,  $J = 6.8$  Hz), 1.92 (sextet, 2H, CH<sub>2</sub>,  $J = 7.5$ ), 1.09 (t, 3H, CH<sub>3</sub>,  $J = 7.5$  Hz). <sup>13</sup>C NMR:  $\delta$  166.9, 154.6, 151.0, 133.5, 127.8, 127.0, 123.6, 116.8, 68.8, 22.2, 10.6.

#### 4-Isopropoxyquinazoline (16d).<sup>5</sup>

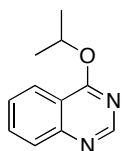

Purification using 15% EtOAc in hexanes gave 90 mg (70%) of **16d** as a yellowish oil.  $R_f$  (SiO<sub>2</sub>/30% EtOAc in hexanes) = 0.6. <sup>1</sup>H NMR:  $\delta$  8.77 (s, 1H, Ar-H), 8.15 (d, 1H, Ar-H,  $J = 8.3$  Hz), 7.89 (d, 1H, Ar-H,  $J = 8.3$  Hz), 7.79 (t, 1H, Ar-H,  $J = 7.5$  Hz), 7.52 (t, 1H, Ar-H,  $J = 7.5$  Hz), 5.62 (septet, 1H, OCH,  $J = 6.3$  Hz), 1.45 (d, 6H, (CH<sub>3</sub>)<sub>2</sub>,  $J = 6.3$  Hz). <sup>13</sup>C NMR:  $\delta$  166.4, 154.6, 151.1, 133.4, 127.7, 126.8, 123.8, 117.2, 70.3, 22.0.

#### 2-(4-Quinazolinylloxy)ethanol (16e).

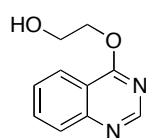

Purification using 70% EtOAc in hexanes gave 100 mg (77%) of **16e** as a white solid.  $R_f$  (SiO<sub>2</sub>/100% EtOAc) = 0.2. <sup>1</sup>H NMR:  $\delta$  8.76 (s, 1H, Ar-H), 8.16 (d, 1H, Ar-H,  $J = 8.3$  Hz), 7.93 (d, 1H, Ar-H,  $J = 8.3$  Hz), 7.81 (td, 1H, Ar-H,  $J = 1.4, 8.3$  Hz), 7.55 (t, 1H, Ar-H,  $J = 7.5$  Hz), 4.75 (t, 2H, OCH<sub>2</sub>,  $J = 4.4$  Hz), 4.08 (br s, 2H, CH<sub>2</sub>OH), 3.36 (br s, 1H, OH). <sup>13</sup>C NMR:  $\delta$  167.1, 154.0, 151.1, 134.0, 127.9, 127.4, 123.7, 116.6, 69.7, 61.9. HRMS (ESI) calcd for C<sub>10</sub>H<sub>11</sub>N<sub>2</sub>O<sub>2</sub> [M + H]<sup>+</sup> 191.0815, found 191.0815.

#### 4-(Allyloxy)quinazoline (16f).<sup>6</sup>

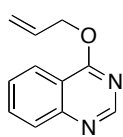

Purification using 20% EtOAc in hexanes gave 96 mg (75%) of **16f** as a yellowish liquid.  $R_f$  (SiO<sub>2</sub>/30% EtOAc in hexanes) = 0.6. <sup>1</sup>H NMR: δ 8.79 (s, 1H, Ar-H), 8.20 (d, 1H, Ar-H,  $J$  = 8.3 Hz), 7.93 (d, 1H, Ar-H,  $J$  = 8.3 Hz), 7.82 (td, 1H, Ar-H,  $J$  = 1.4, 8.3 Hz), 7.56 (t, 1H, Ar-H,  $J$  = 7.5 Hz), 6.16 (m, 1H, -CH=), 5.48 (dd, 1H, =CH<sub>trans</sub>,  $J$  = 1.4, 17.0 Hz), 5.33 (dd, 1H, =CH<sub>cis</sub>,  $J$  = 1.4, 10.7 Hz), 5.10 (d, 2H, OCH<sub>2</sub>,  $J$  = 5.3 Hz). <sup>13</sup>C NMR: δ 166.5, 154.5, 151.2, 133.6, 132.5, 127.9, 127.2, 123.7, 118.6, 116.8, 67.6.

#### 4-(2-Propynyloxy)quinazoline (16g).<sup>6</sup>

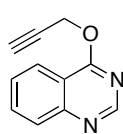

Purification using 20% EtOAc in hexanes gave 94 mg (75%) of **16g** as a white solid.  $R_f$  (SiO<sub>2</sub>/20% EtOAc in hexanes) = 0.5. <sup>1</sup>H NMR: δ 8.81 (s, 1H, Ar-H), 8.19 (d, 1H, Ar-H,  $J$  = 7.8 Hz), 7.88 (d, 1H, Ar-H,  $J$  = 8.3 Hz), 7.83 (t, 1H, Ar-H,  $J$  = 8.3 Hz), 7.56 (t, 1H, Ar-H,  $J$  = 7.5 Hz), 5.21 (s, 2H, OCH<sub>2</sub>), 2.55 (s, 1H, ≡CH). <sup>13</sup>C NMR: δ 165.7, 154.1, 151.2, 133.9, 127.9, 127.4, 123.6, 116.5, 78.1, 75.4, 54.5.

#### 4-(Cyclopentyloxy)quinazoline (16h).

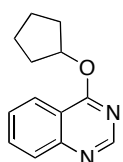

Purification using 20% EtOAc in hexanes gave 115 mg (78%) of **16h** as a colorless oil.  $R_f$  (SiO<sub>2</sub>/30% EtOAc in hexanes) = 0.5. <sup>1</sup>H NMR: δ 8.78 (s, 1H, Ar-H), 8.12 (d, 1H, Ar-H,  $J$  = 8.3 Hz), 7.89 (d, 1H, Ar-H,  $J$  = 8.3 Hz), 7.79 (t, 1H, Ar-H,  $J$  = 8.3 Hz), 7.51 (t, 1H, Ar-H,  $J$  = 7.5 Hz), 5.72 (m, 1H, OCH), 2.08–2.01 (m, 2H, CH<sub>2</sub>), 1.95–1.89 (m, 2H, CH<sub>2</sub>), 1.88–1.81 (m, 2H, CH<sub>2</sub>), 1.73–1.65 (m, 2H, CH<sub>2</sub>). <sup>13</sup>C NMR: δ 166.7, 154.7, 151.1, 133.5, 127.8, 126.9, 123.8, 117.3, 79.9, 33.0, 24.1. HRMS (ESI) calcd for C<sub>13</sub>H<sub>15</sub>N<sub>2</sub>O [M + H]<sup>+</sup> 215.1179, found 215.1176.

#### 4-(Cyclohexyloxy)quinazoline (16i).<sup>7</sup>

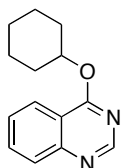

Purification using 20% EtOAc in hexanes gave 120 mg (77%) of **16i** as a colorless oil.  $R_f$  (SiO<sub>2</sub>/30% EtOAc in hexanes) = 0.5. <sup>1</sup>H NMR: δ 8.77 (s, 1H, Ar-H), 8.17 (d, 1H, Ar-H,  $J$  = 7.8 Hz), 7.90 (d, 1H, Ar-H,  $J$  = 8.3 Hz), 7.80 (t, 1H, Ar-H,  $J$  = 8.0 Hz), 7.53 (t, 1H, Ar-H,  $J$  = 7.5 Hz), 5.41 (m, 1H, OCH), 2.08–2.05 (m, 2H, CH<sub>2</sub>), 1.85–1.82 (m, 2H, CH<sub>2</sub>), 1.73–1.66 (m, 2H, CH<sub>2</sub>), 1.62–1.58 (m, 1H, CH<sub>2</sub>), 1.54–1.46 (m, 2H, CH<sub>2</sub>), 1.42–1.37 (m, 1H, CH<sub>2</sub>). <sup>13</sup>C NMR: δ 166.5, 154.7, 151.2, 133.5, 127.8, 126.9, 123.8, 117.3, 75.0, 31.6, 25.7, 23.8.

#### 4-(Benzyloxy)quinazoline (16j).<sup>8</sup>

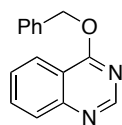

Purification using 5% MeOH in hexanes gave 155 mg (96%) of **16j** as a colorless oil.  $R_f$  (SiO<sub>2</sub>/40% EtOAc in hexanes) = 0.4. <sup>1</sup>H NMR: δ 8.83 (s, 1H, Ar-H), 8.20 (dd, 1H, Ar-H,  $J$  = 0.7, 8.2 Hz), 7.94 (d, 1H, Ar-H,  $J$  = 8.4 Hz), 7.82 (td, 1H, Ar-H,  $J$  = 1.4, 7.0 Hz), 7.54 (m, 3H, Ar-H), 7.41 (t, 2H, Ar-H,  $J$  = 7.2 Hz), 7.36 (t, 1H, Ar-H,  $J$  = 7.2 Hz), 5.64 (br s, 2H, OCH<sub>2</sub>). <sup>13</sup>C NMR: δ 166.7, 154.5, 151.2, 136.3, 133.8, 128.8, 128.5, 128.3, 127.9, 127.2, 123.7, 116.8, 68.7.

#### 4-(4-Methoxyphenoxy)quinazoline (**16k**).<sup>9</sup>

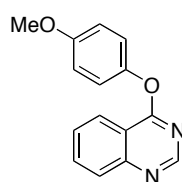

Purification using 30% EtOAc in hexanes gave 165 mg (96%) of **16k** as a white solid.  $R_f$  (SiO<sub>2</sub>/30% EtOAc in hexanes) = 0.5. <sup>1</sup>H NMR: δ 8.77 (s, 1H, Ar-H), 8.36 (d, 1H, Ar-H,  $J$  = 8.1 Hz), 7.99 (d, 1H, Ar-H,  $J$  = 8.4), 7.89 (t, 1H, Ar-H,  $J$  = 7.1 Hz), 7.63 (t, 1H, Ar-H,  $J$  = 7.5 Hz), 7.18 (br d, 2H, Ar-H,  $J$  = 8.9 Hz), 6.98 (br d, 2H, Ar-H,  $J$  = 8.9 Hz), 3.83 (s, 3H, OCH<sub>3</sub>). <sup>13</sup>C NMR: δ 167.4, 157.5, 154.5, 151.7, 145.8, 134.1, 128.0, 127.6, 123.7, 122.8, 116.6, 114.9, 55.7.

#### 2-(Methoxy)-4-methylpyrimidine (**17a**).<sup>10</sup>

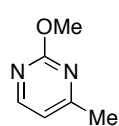

Purification using 15% EtOAc in hexanes gave 65 mg (77%) of **17a** as a clear oil.  $R_f$  (SiO<sub>2</sub>/20% EtOAc in hexanes) = 0.2. <sup>1</sup>H NMR: δ 8.33 (d, 1H, Ar-H,  $J$  = 4.8 Hz), 6.78 (d, 1H, Ar-H,  $J$  = 4.8 Hz), 3.98 (s, 3H, OCH<sub>3</sub>), 2.44 (s, 3H, CH<sub>3</sub>). <sup>13</sup>C NMR: δ 170.2, 165.7, 158.7, 114.6, 54.8, 24.2.

#### 2-(Isopropoxy)-4-methylpyrimidine (**17b**).

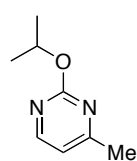

Purification using 15% EtOAc in hexanes gave 76 mg (73%) of **17b** as a yellowish oil.  $R_f$  (SiO<sub>2</sub>/20% EtOAc in hexanes) = 0.5. <sup>1</sup>H NMR: δ 8.31 (d, 1H, Ar-H,  $J$  = 4.8 Hz), 6.74 (d, 1H, Ar-H,  $J$  = 4.8 Hz), 5.27 (septet, 1H, OCH,  $J$  = 6.3 Hz), 2.43 (s, 3H, CH<sub>3</sub>), 1.38 (d, 6H, (CH<sub>3</sub>)<sub>2</sub>,  $J$  = 6.3 Hz). <sup>13</sup>C NMR: δ 170.1, 164.9, 158.6, 114.2, 70.0, 24.3, 22.1. HRMS (ESI) calcd for C<sub>8</sub>H<sub>13</sub>N<sub>2</sub>O [M + H]<sup>+</sup> 153.1022, found 153.1033.

#### 2-(Allyloxy)-4-methylpyrimidine (**17c**).

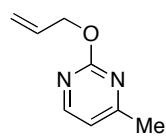

Purification using 20% EtOAc in hexanes gave 77 mg (75%) of **17c** as a yellowish oil.  $R_f$  (SiO<sub>2</sub>/40% EtOAc in hexanes) = 0.5. <sup>1</sup>H NMR: δ 8.31 (d, 1H, Ar-H,  $J$  = 4.8 Hz), 6.76 (d, 1H, Ar-H,  $J$  = 4.8 Hz), 6.06 (m, 1H, -CH=), 5.39 (d,

1H, =CH<sub>trans</sub>,  $J = 17.5$  Hz), 5.22 (d, 1H, =CH<sub>cis</sub>,  $J = 10.2$  Hz), 4.86 (d, 2H, OCH<sub>2</sub>,  $J = 5.3$  Hz), 2.43 (s, 3H, Ar-CH<sub>3</sub>). <sup>13</sup>C NMR:  $\delta$  170.2, 165.0, 158.6, 133.0, 117.8, 114.7, 68.0, 24.2. HRMS (ESI) calcd for C<sub>8</sub>H<sub>11</sub>N<sub>2</sub>O [M + H]<sup>+</sup> 151.0866, found 151.0861.

### 2-[(4-Methylpyrimidin-2-yl)oxy]ethanol (**17d**).

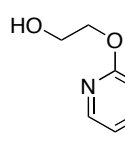

Purification using 60% EtOAc in hexanes gave 74 mg (70%) of **17d** as a pale yellow liquid.  $R_f$  (SiO<sub>2</sub>/EtOAc) = 0.3. <sup>1</sup>H NMR:  $\delta$  8.34 (d, 1H, Ar-H,  $J = 4.9$  Hz), 6.82 (d, 1H, Ar-H,  $J = 4.9$  Hz), 4.49 (t, 2H, OCH<sub>2</sub>,  $J = 4.3$  Hz), 3.97 (t, 2H, OCH<sub>2</sub>,  $J = 4.3$  Hz), 2.97 (br s, 1H, OH), 2.46 (s, 3H, CH<sub>3</sub>). <sup>13</sup>C NMR:  $\delta$  170.4, 165.2, 158.7, 115.0, 69.6, 62.0, 24.2. HRMS (ESI) calcd for C<sub>7</sub>H<sub>11</sub>N<sub>2</sub>O<sub>2</sub> [M + H]<sup>+</sup> 155.0815, found 155.0814.

### 5-Bromo-2-methoxypyrimidine (**18a**).<sup>11</sup>

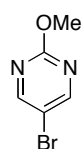

Purification using 30% EtOAc in hexanes gave 85 mg (78%) of **18a** as a colorless liquid.  $R_f$  (SiO<sub>2</sub>/40% EtOAc in hexanes) = 0.5. <sup>1</sup>H NMR:  $\delta$  8.52 (s, 2H, Ar-H), 3.98 (s, 3H, OCH<sub>3</sub>). <sup>13</sup>C NMR:  $\delta$  164.4, 159.7, 112.0, 55.6.

### 5-Bromo-2-isopropoxypyrimidine (**18b**).<sup>12</sup>

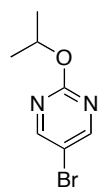

Purification using 30% EtOAc in hexanes gave 100 mg (80%) of **18b** as a clear oil.  $R_f$  (SiO<sub>2</sub>/40% EtOAc in hexanes) = 0.6. <sup>1</sup>H NMR:  $\delta$  8.48 (s, 2H, Ar-H), 5.19 (septet, 1H, OCH,  $J = 6.3$  Hz), 1.37 (d, 6H, (CH<sub>3</sub>)<sub>2</sub>,  $J = 6.3$  Hz). <sup>13</sup>C NMR:  $\delta$  163.6, 159.7, 111.3, 71.3, 21.8.

### 2-(Allyloxy)-5-bromopyrimidine (**18c**).<sup>13</sup>

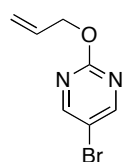

Purification using 30% EtOAc in hexanes gave 97 mg (79%) of **18c** as a yellowish solid.  $R_f$  (SiO<sub>2</sub>/40% EtOAc in hexanes) = 0.5. <sup>1</sup>H NMR:  $\delta$  8.50 (s, 2H, Ar-H), 6.06 (m, 1H, -CH=), 5.41 (dq, 1H, =CH<sub>trans</sub>,  $J = 1.5, 17.2$  Hz), 5.39 (dd, 1H, =CH<sub>cis</sub>,  $J = 1.2, 10.5$  Hz), 4.72 (dt, 2H, OCH<sub>2</sub>,  $J = 1.4, 6.8$  Hz). <sup>13</sup>C NMR:  $\delta$  163.7, 159.7, 132.3, 118.4, 112.0, 68.8.

### 2-(5-Bromopyrimidin-2-yloxy)ethanol (**18d**).

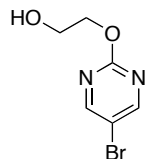

Purification using 40% EtOAc in hexanes gave 94 mg (75%) of **18d** as a white solid.  $R_f$  (SiO<sub>2</sub>/40% EtOAc in hexanes) = 0.4. <sup>1</sup>H NMR:  $\delta$  8.51 (s, 2H, Ar-H), 4.45 (t, 2H, OCH<sub>2</sub>,  $J = 4.6$  Hz), 3.94–3.97 (m, 2H, OCH<sub>2</sub>), 2.98 (t, 1H, OH,  $J = 6.3$  Hz).

$^{13}\text{C}$  NMR:  $\delta$  164.0, 159.9, 112.3, 70.1, 61.4. HRMS (ESI) calcd for  $\text{C}_6\text{H}_8\text{BrN}_2\text{O}_2$   $[\text{M} + \text{H}]^+$  218.9764, found 218.9763.

**5-Bromo-2-(4-methoxyphenoxy)pyrimidine (18e).**<sup>14</sup>

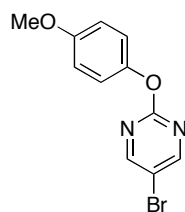

Purification using 20% EtOAc in hexanes gave 114 mg (71%) of **18e** as a white solid.  $R_f$  ( $\text{SiO}_2$ /20% EtOAc in hexanes) = 0.4.  $^1\text{H}$  NMR:  $\delta$  8.55 (s, 2H, Ar-H), 7.09 (d, 2H, Ar-H,  $J = 8.9$  Hz), 6.93 (d, 2H, Ar-H,  $J = 8.9$  Hz), 3.81 (s, 3H,  $\text{OCH}_3$ ).  $^{13}\text{C}$  NMR:  $\delta$  164.4, 160.1, 157.3, 146.3, 122.4, 114.8, 113.1, 55.7.

1203-hp-01-050

Pulse Sequence: s2pul  
Solvent: CDCl3  
Temp. 25.0 C / 298.1 K  
Operator: mkl  
File: 1203-hp-01-050  
INNOVA-500 "riga"

Relax. delay 1.500 sec  
Pulse 57.9 degrees  
Acq. time 1.892 sec  
Width 8000.0 Hz  
10 repetitions  
OBSERVE H1, 499.7707217 MHz  
DATA PROCESSING  
FT size 32768  
Total time 0 min, 34 sec

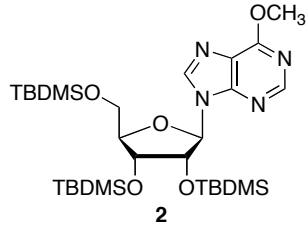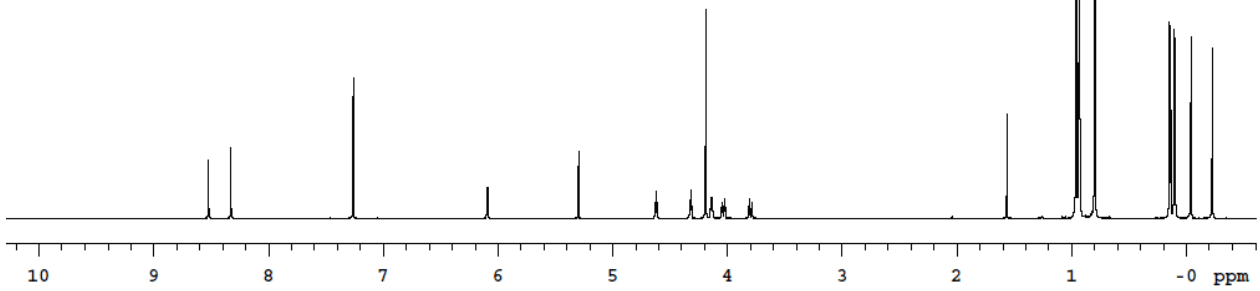

1203-hp-01-046

Pulse Sequence: s2pul  
Solvent: CDCl3  
Temp. 25.0 C / 298.1 K  
Operator: mkl  
File: 1203-hp-01-046  
INNOVA-500 "riga"

Relax. delay 1.500 sec  
Pulse 57.9 degrees  
Acq. time 1.892 sec  
Width 8000.0 Hz  
16 repetitions  
OBSERVE H1, 499.7707222 MHz  
DATA PROCESSING  
FT size 32768  
Total time 0 min, 54 sec

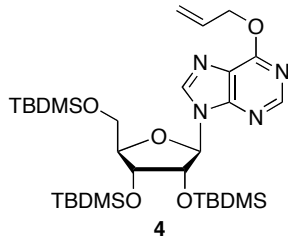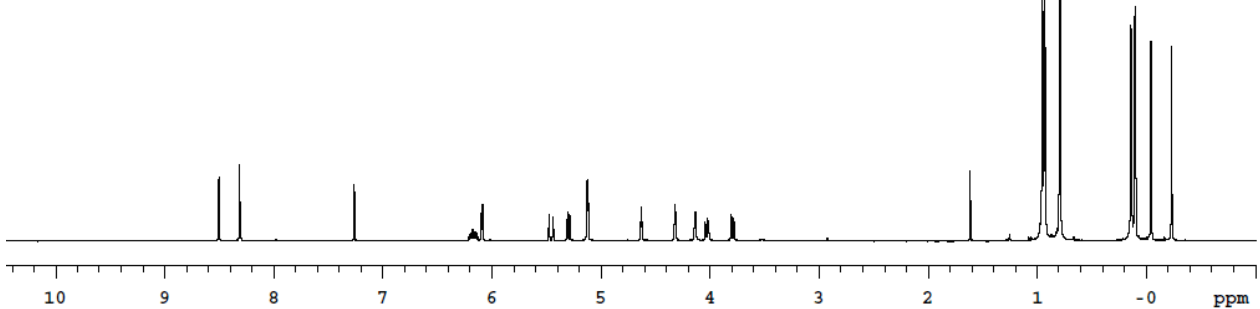

1203-hp-01-048  
Pulse Sequence: s2pul  
Solvent: CDCl3  
Temp. 25.0 C / 298.1 K  
Operator: mkl  
File: 1203-hp-01-048  
INOVA-500 "riga"

Relax. delay 1.500 sec  
Pulse 57.9 degrees  
Acq. time 1.892 sec  
Width 8000.0 Hz  
10 repetitions  
OBSERVE H1, 499.7707217 MHz  
DATA PROCESSING  
FT size 32768  
Total time 0 min, 34 sec

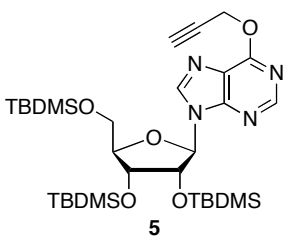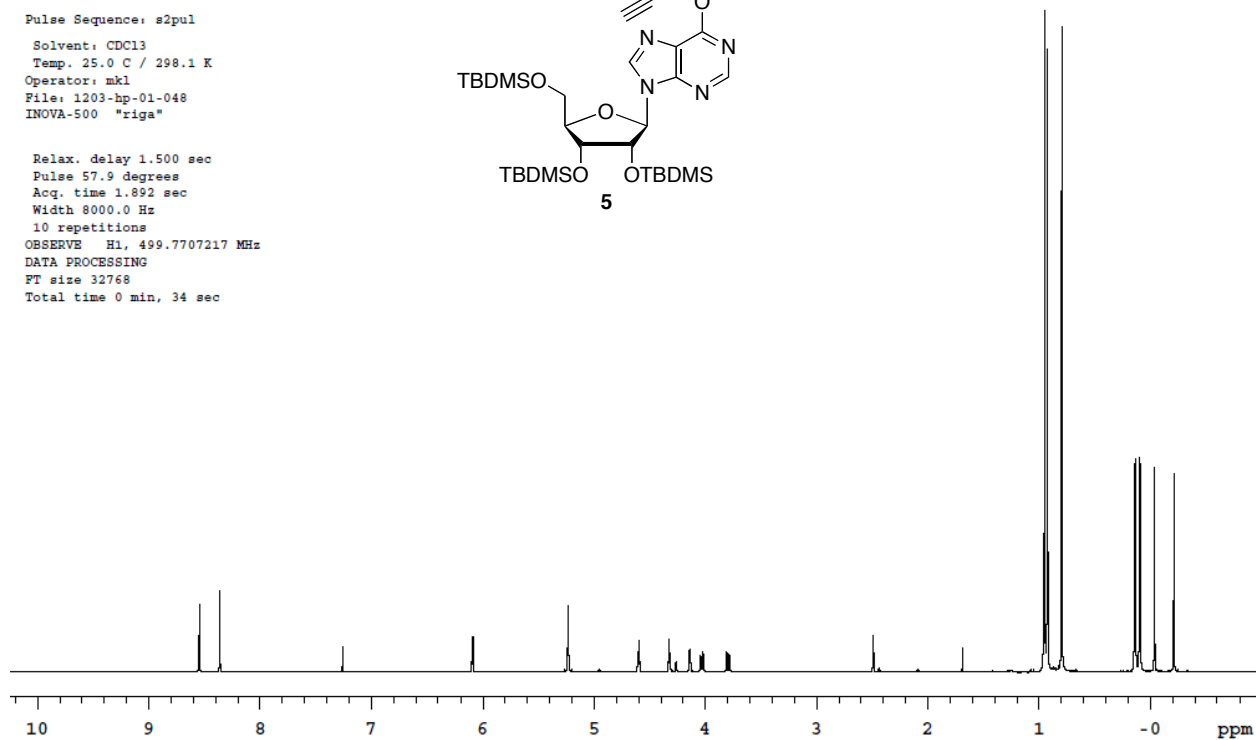

1203-hp-01-047  
Pulse Sequence: s2pul  
Solvent: CDCl3  
Temp. 25.0 C / 298.1 K  
Operator: mkl  
File: 1203-hp-01-047  
INOVA-500 "riga"

Relax. delay 1.500 sec  
Pulse 57.9 degrees  
Acq. time 1.892 sec  
Width 8000.0 Hz  
4 repetitions  
OBSERVE H1, 499.7707212 MHz  
DATA PROCESSING  
FT size 32768  
Total time 0 min, 13 sec

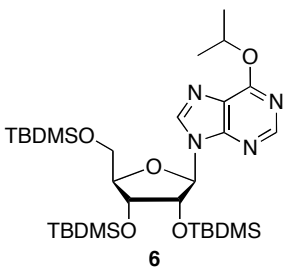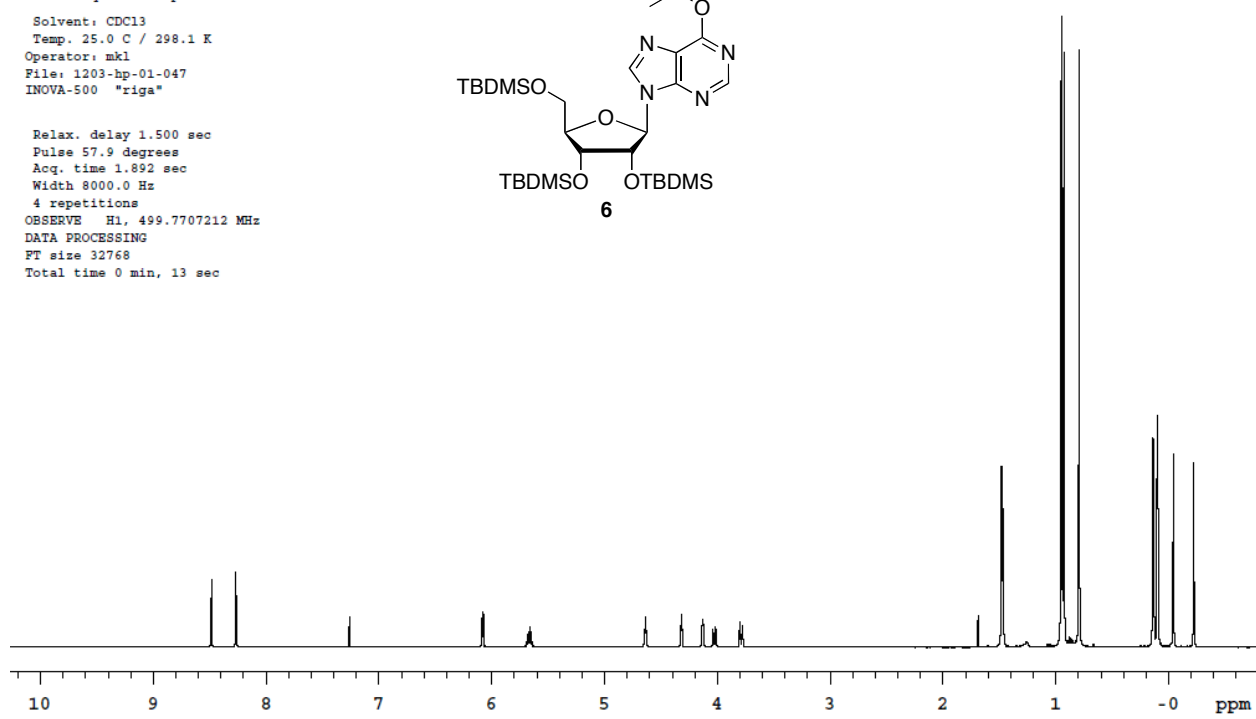

1203-HP-01-049b

Pulse Sequence: s2pul  
Solvent: CDCl3  
Temp. 25.0 C / 298.1 K  
Operator: mkl  
File: 1203-HP-01-049b  
INNOVA-500 "riga"

Relax. delay 1.500 sec  
Pulse 57.9 degrees  
Acq. time 1.892 sec  
Width 8000.0 Hz  
10 repetitions  
OBSERVE H1, 499.7707222 MHz  
DATA PROCESSING  
Line broadening 0.1 Hz  
FT size 32768  
Total time 0 min, 34 sec

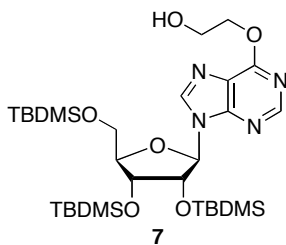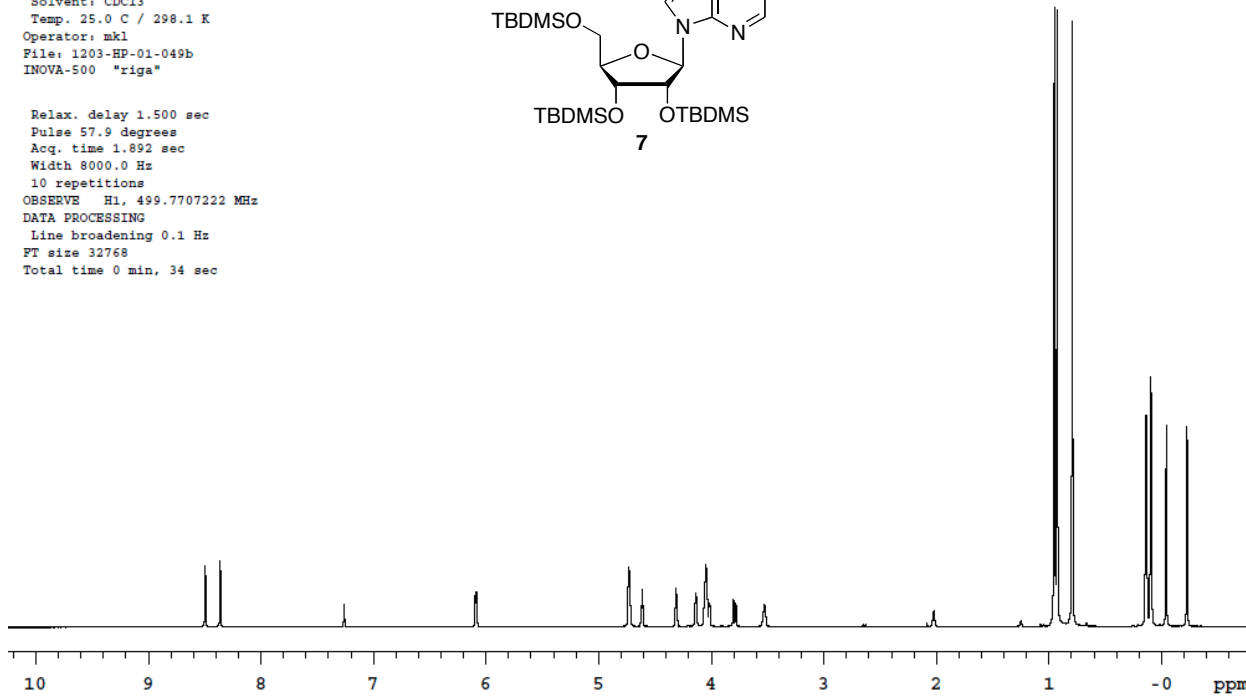

1203-HP-01-049t

Pulse Sequence: s2pul  
Solvent: CDCl3  
Temp. 25.0 C / 298.1 K  
Operator: mkl  
File: 1203-HP-01-049t  
INNOVA-500 "riga"

Relax. delay 1.500 sec  
Pulse 57.9 degrees  
Acq. time 1.892 sec  
Width 8000.0 Hz  
10 repetitions  
OBSERVE H1, 499.7707222 MHz  
DATA PROCESSING  
Line broadening 0.1 Hz  
FT size 32768  
Total time 0 min, 34 sec

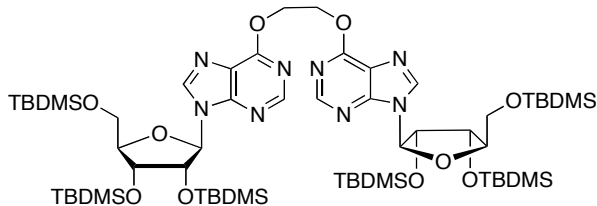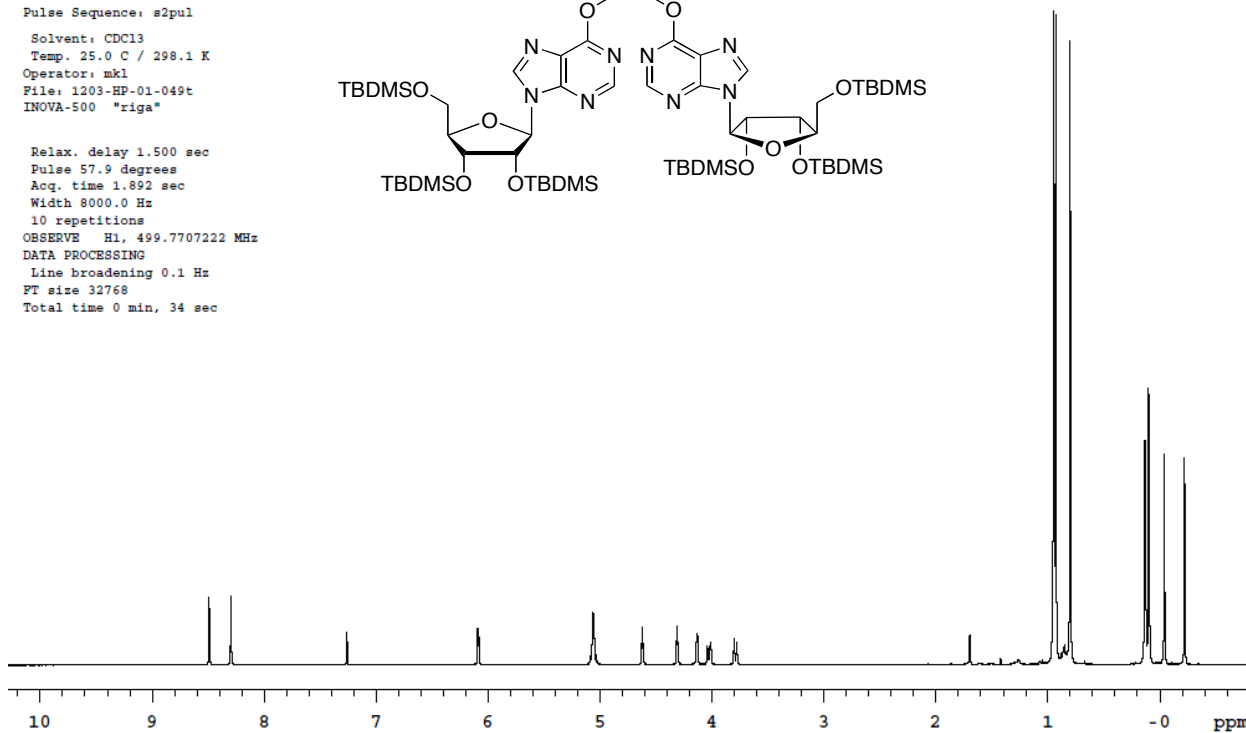





1203-HP-01-065-1H

Pulse Sequence: s2pul  
Solvent: cdcl3  
Temp. 25.0 C / 298.1 K  
Operator: mkl  
File: 1203-HP-01-065-1H  
INOVA-500 "riga"

Relax. delay 2.000 sec  
Pulse 45.0 degrees  
Acq. time 1.892 sec  
Width 8000.0 Hz  
85 repetitions  
OBSERVE H1, 499.7707217 MHz  
DATA PROCESSING  
FT size 32768  
Total time 5 min, 43 sec

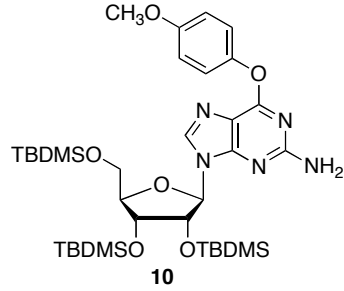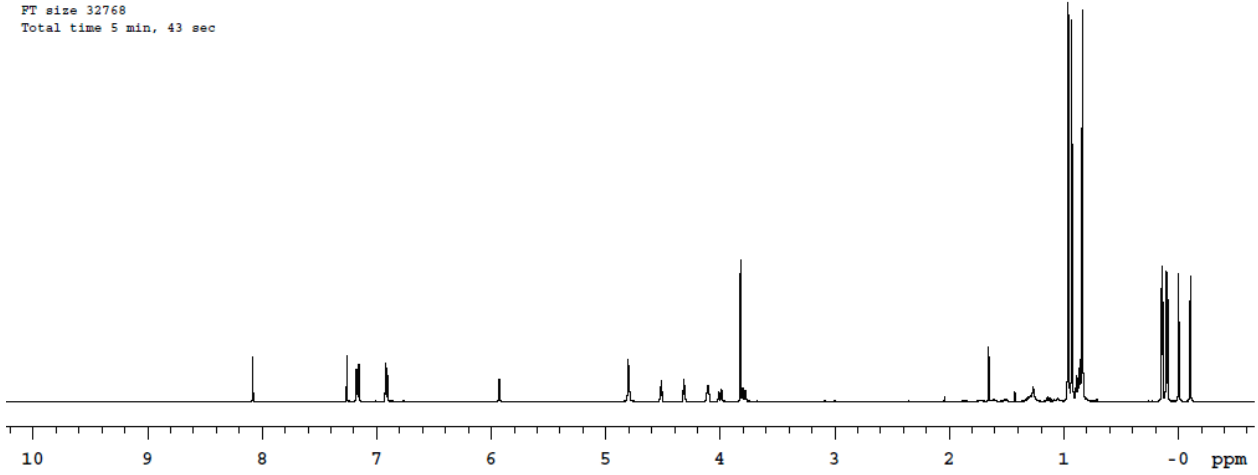

1203-HP-01-068repeat-1H

Pulse Sequence: s2pul  
Solvent: cdcl3  
Temp. 25.0 C / 298.1 K  
Operator: mkl  
File: 1203-HP-01-068repeat-1H  
INOVA-500 "riga"

Relax. delay 2.000 sec  
Pulse 45.0 degrees  
Acq. time 1.892 sec  
Width 8000.0 Hz  
88 repetitions  
OBSERVE H1, 499.7707217 MHz  
DATA PROCESSING  
FT size 32768  
Total time 5 min, 43 sec

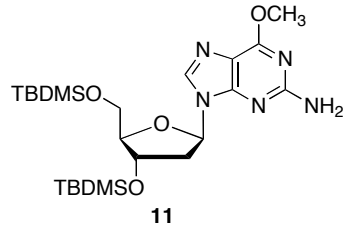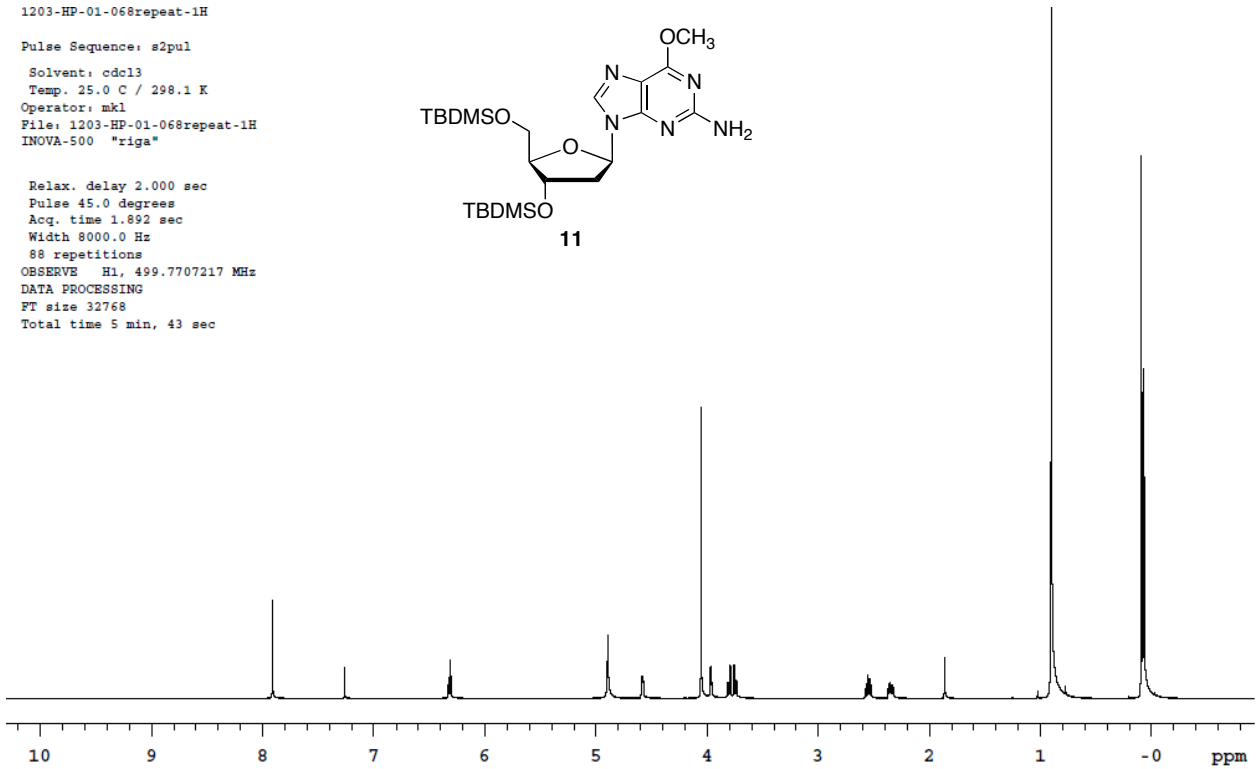

1203-HP-01-067-1H

Pulse Sequence: s2pul  
Solvent: cdcl3  
Temp. 25.0 C / 298.1 K  
Operator: mkl  
File: 1203-HP-01-067-1H  
INNOVA-500 "riga"

Relax. delay 2.000 sec  
Pulse 45.0 degrees  
Acq. time 1.892 sec  
Width 8000.0 Hz  
67 repetitions  
OBSERVE H1, 499.7707222 MHz  
DATA PROCESSING  
FT size 32768  
Total time 5 min, 43 sec

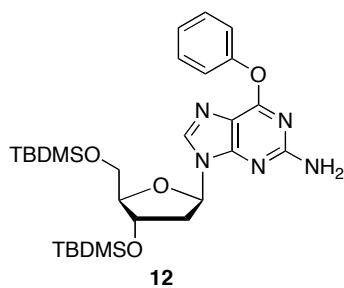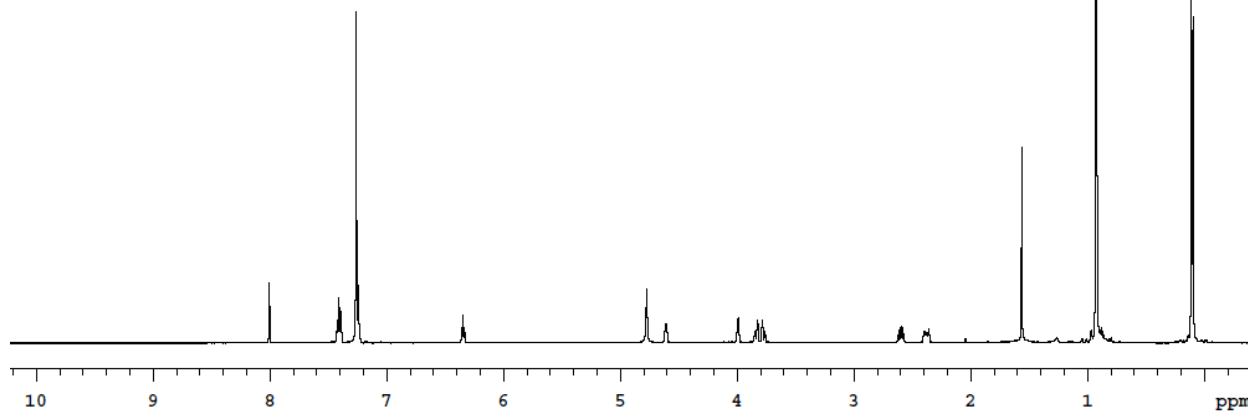

1203-hp-01-022

Pulse Sequence: s2pul  
Solvent: CDCl3  
Temp. 25.0 C / 298.1 K  
Operator: mkl  
File: 1203-hp-01-022  
INNOVA-500 "riga"

Relax. delay 1.500 sec  
Pulse 57.9 degrees  
Acq. time 1.892 sec  
Width 8000.0 Hz  
16 repetitions  
OBSERVE H1, 499.7707207 MHz  
DATA PROCESSING  
FT size 32768  
Total time 0 min, 54 sec

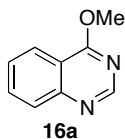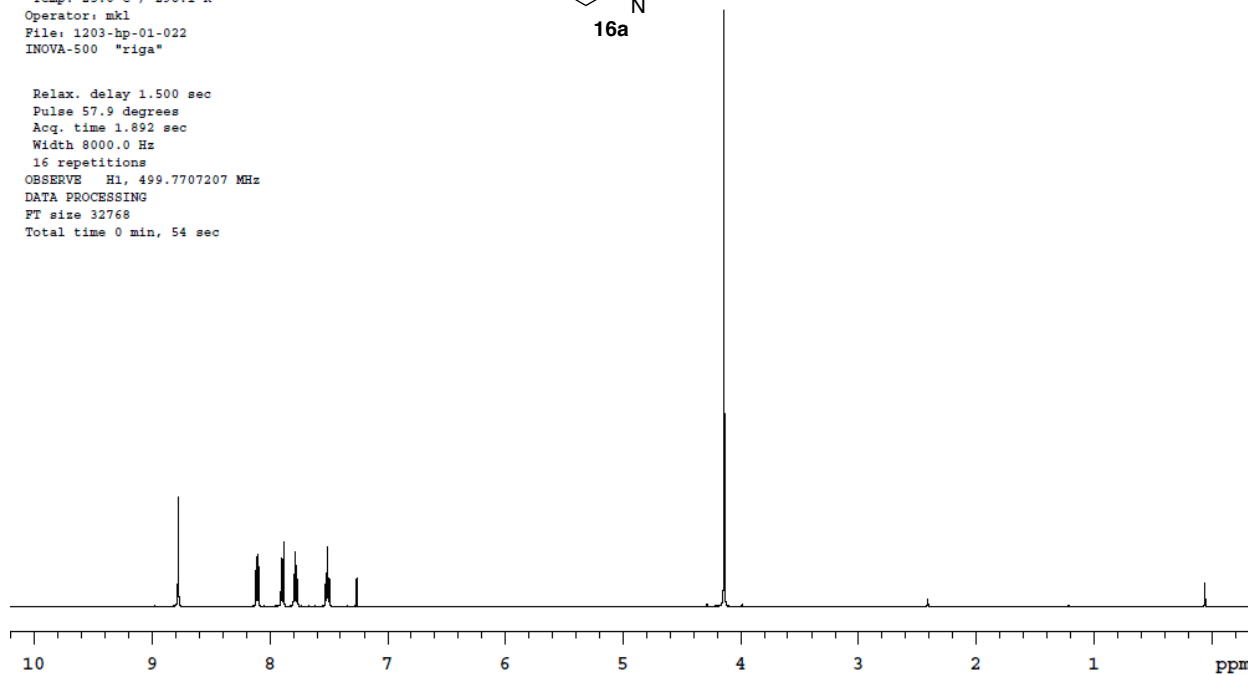

1203-HP-01-023

Pulse Sequence: s2pul  
Solvent: CDCl3  
Temp. 25.0 C / 298.1 K  
Operator: mkl  
File: 1203-HP-01-023  
INNOVA-500 "riga"

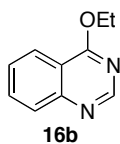

Relax. delay 1.500 sec  
Pulse 57.9 degrees  
Acq. time 1.892 sec  
Width 8000.0 Hz  
12 repetitions  
OBSERVE H1, 499.7707212 MHz  
DATA PROCESSING  
Line broadening 0.1 Hz  
FT size 32768  
Total time 11 min, 20 sec

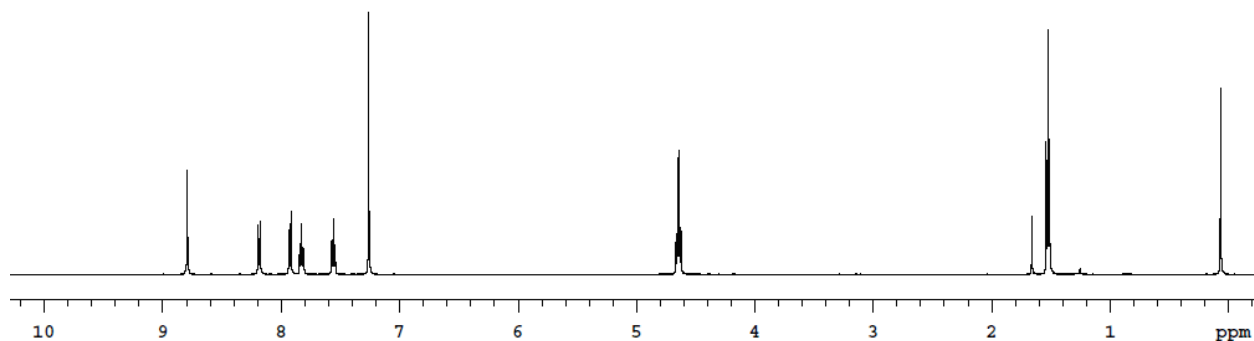

1203-HP-01-024

Pulse Sequence: s2pul  
Solvent: CDCl3  
Temp. 25.0 C / 298.1 K  
Operator: mkl  
File: 1203-HP-01-024  
INNOVA-500 "riga"

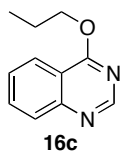

Relax. delay 1.500 sec  
Pulse 57.9 degrees  
Acq. time 1.892 sec  
Width 8000.0 Hz  
32 repetitions  
OBSERVE H1, 499.7707212 MHz  
DATA PROCESSING  
Line broadening 0.1 Hz  
FT size 32768  
Total time 11 min, 20 sec

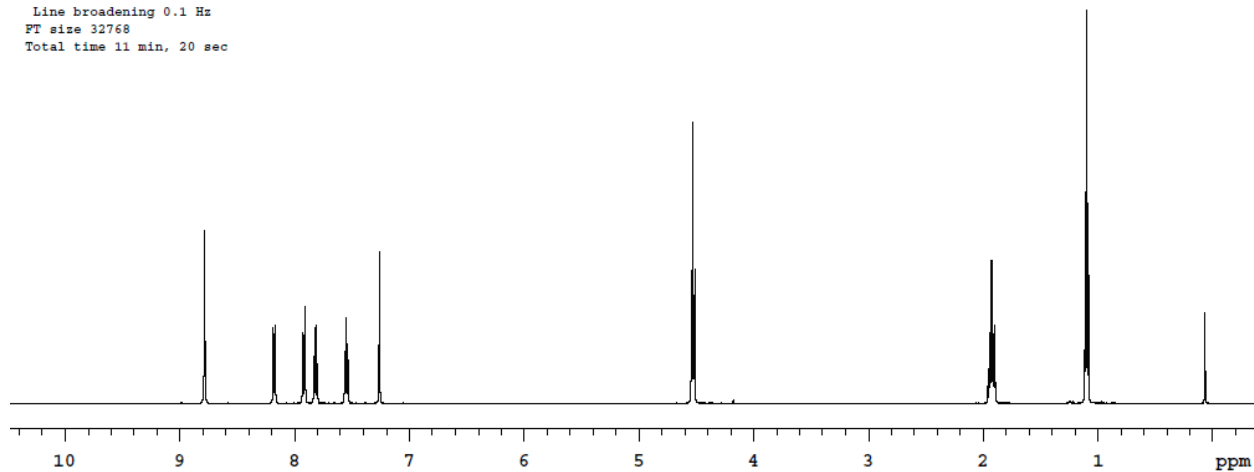

1203-hp-01-025

Pulse Sequence: s2pul  
Solvent: CDCl3  
Temp. 25.0 C / 298.1 K  
Operator: mkl  
File: 1203-hp-01-025  
INNOVA-500 "riga"

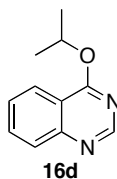

Relax. delay 1.500 sec  
Pulse 57.9 degrees  
Acq. time 1.892 sec  
Width 8000.0 Hz  
16 repetitions  
OBSERVE H1, 499.7707222 MHz  
DATA PROCESSING  
FT size 32768  
Total time 3 min, 37 sec

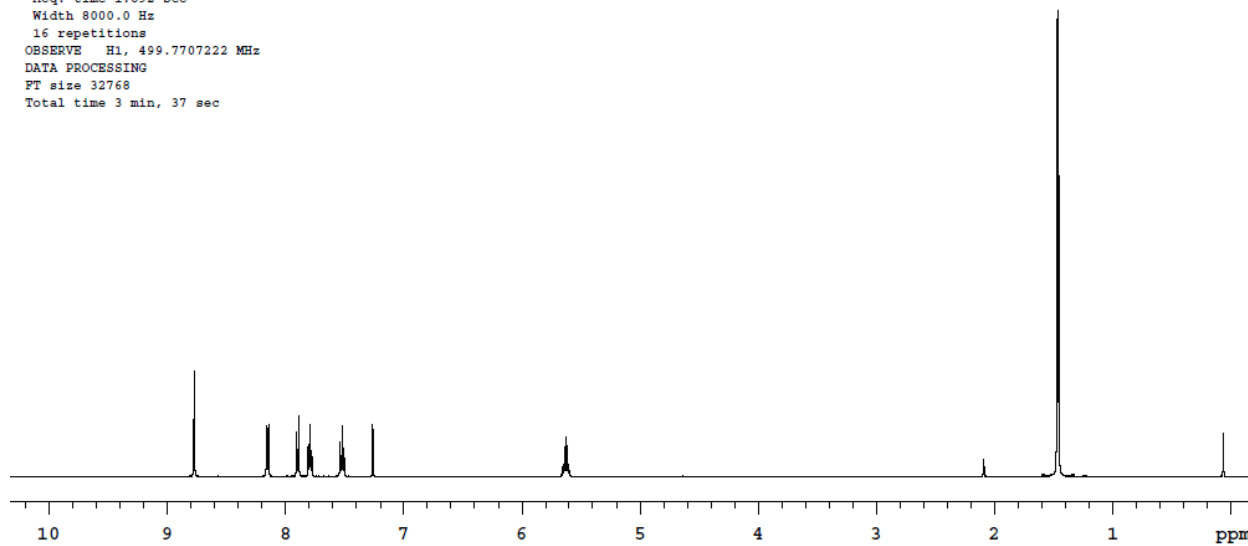

1203-HP-01-028m

Pulse Sequence: s2pul  
Solvent: CDCl3  
Temp. 25.0 C / 298.1 K  
Operator: mkl  
File: 1203-HP-01-028m  
INNOVA-500 "riga"

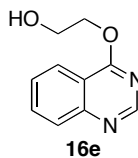

Relax. delay 1.500 sec  
Pulse 57.9 degrees  
Acq. time 1.892 sec  
Width 8000.0 Hz  
64 repetitions  
OBSERVE H1, 499.7707212 MHz  
DATA PROCESSING  
FT size 32768  
Total time 3 min, 37 sec

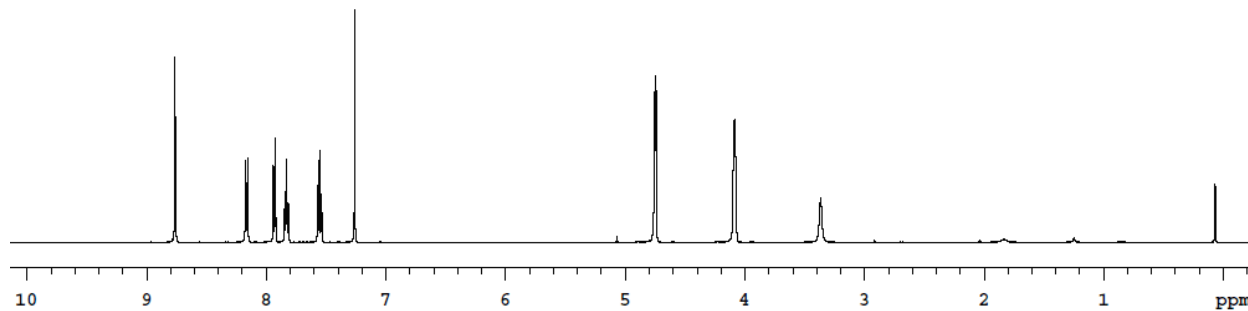

1203-HP-01-029

Pulse Sequence: s2pul  
Solvent: CDCl3  
Temp. 25.0 C / 298.1 K  
Operator: mkl  
File: 1203-HP-01-029  
INNOVA-500 "riga"

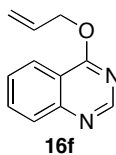

Relax. delay 1.500 sec  
Pulse 57.9 degrees  
Acq. time 1.892 sec  
Width 8000.0 Hz  
164 repetitions  
OBSERVE H1, 499.7707212 MHz  
DATA PROCESSING  
Line broadening 0.1 Hz  
FT size 32768  
Total time 11 min, 20 sec

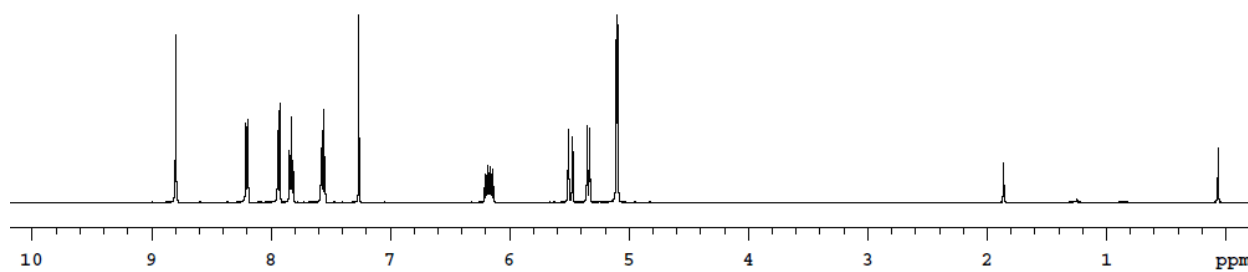

1203-HP-01-030

Pulse Sequence: s2pul  
Solvent: CDCl3  
Temp. 25.0 C / 298.1 K  
Operator: mkl  
File: 1203-HP-01-030  
INNOVA-500 "riga"

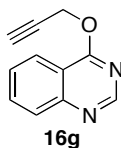

Relax. delay 1.500 sec  
Pulse 57.9 degrees  
Acq. time 1.892 sec  
Width 8000.0 Hz  
20 repetitions  
OBSERVE H1, 499.7707212 MHz  
DATA PROCESSING  
Line broadening 0.1 Hz  
FT size 32768  
Total time 11 min, 20 sec

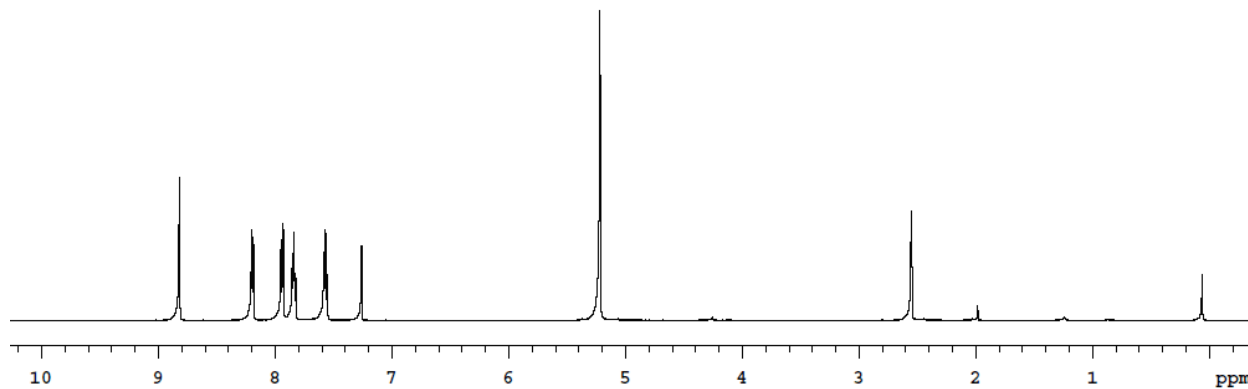

1203-hp-01-032p

Pulse Sequence: s2pul  
Solvent: CDCl3  
Temp. 25.0 C / 298.1 K  
Operator: mkl  
File: 1203-hp-01-032p  
INNOVA-500 "riga"

Relax. delay 1.500 sec  
Pulse 57.9 degrees  
Acq. time 1.892 sec  
Width 8000.0 Hz  
16 repetitions  
OBSERVE H1, 499.7707217 MHz  
DATA PROCESSING  
Line broadening 0.1 Hz  
FT size 32768  
Total time 0 min, 54 sec

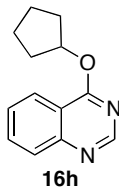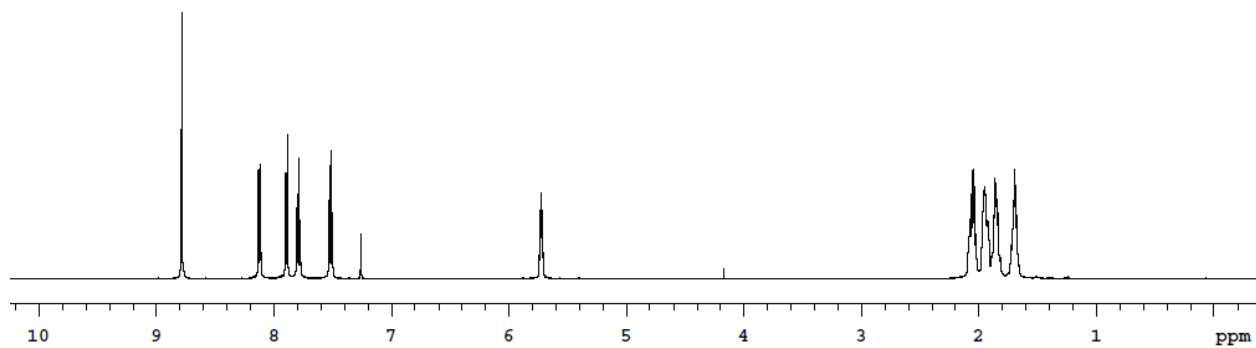

1203-hp-01-031p

Pulse Sequence: s2pul  
Solvent: CDCl3  
Temp. 25.0 C / 298.1 K  
Operator: mkl  
File: 1203-hp-01-031p  
INNOVA-500 "riga"

Relax. delay 1.500 sec  
Pulse 57.9 degrees  
Acq. time 1.892 sec  
Width 8000.0 Hz  
16 repetitions  
OBSERVE H1, 499.7707212 MHz  
DATA PROCESSING  
Line broadening 0.1 Hz  
FT size 32768  
Total time 0 min, 54 sec

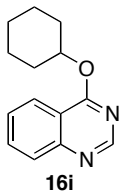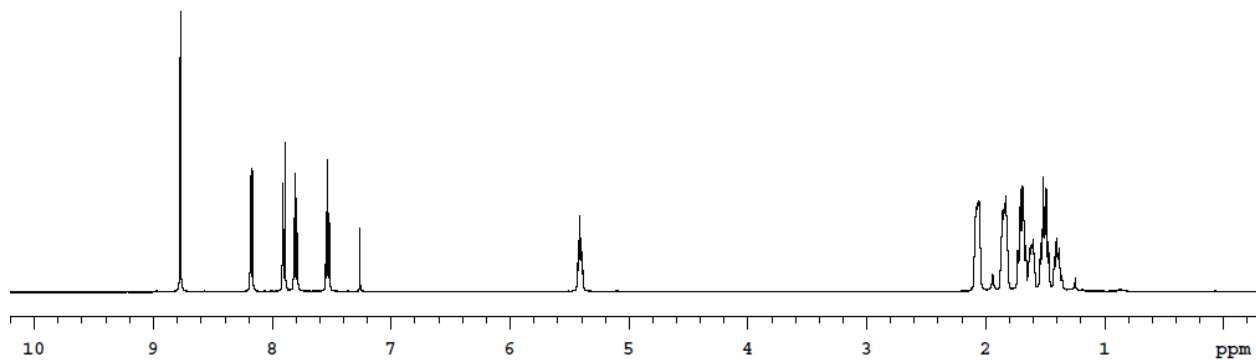

1203-HP-01-033repeat-puril-1H

Pulse Sequence: s2pul

Solvent: cdcl3  
Temp. 25.0 C / 298.1 K

Operator: mkl

File: 1203-HP-01-033repeat-puril-1H  
INOVA-500 "riga"

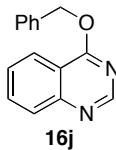

Relax. delay 2.000 sec  
Pulse 45.0 degrees  
Acq. time 1.892 sec  
Width 8000.0 Hz  
99 repetitions  
OBSERVE H1, 499.7707217 MHz  
DATA PROCESSING  
FT size 32768  
Total time 13 min, 0 sec

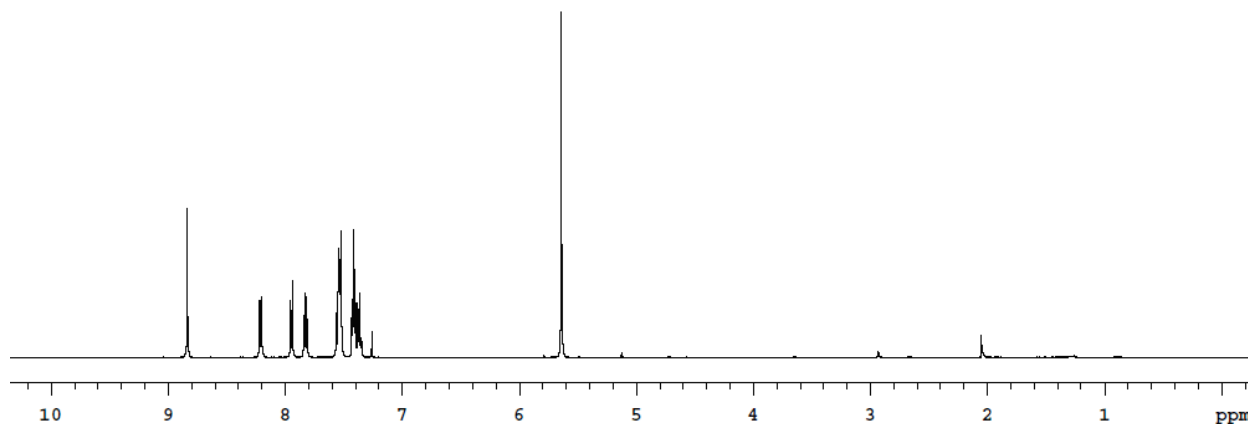

1203-HP-01-062-1h

Pulse Sequence: s2pul

Solvent: cdcl3  
Temp. 25.0 C / 298.1 K

Operator: mkl

File: 1203-HP-01-062-1h  
INOVA-500 "riga"

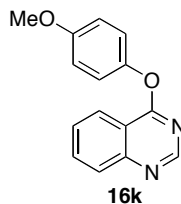

Relax. delay 2.000 sec  
Pulse 45.0 degrees  
Acq. time 1.892 sec  
Width 8000.0 Hz  
58 repetitions  
OBSERVE H1, 499.7707217 MHz  
DATA PROCESSING  
FT size 32768  
Total time 5 min, 43 sec

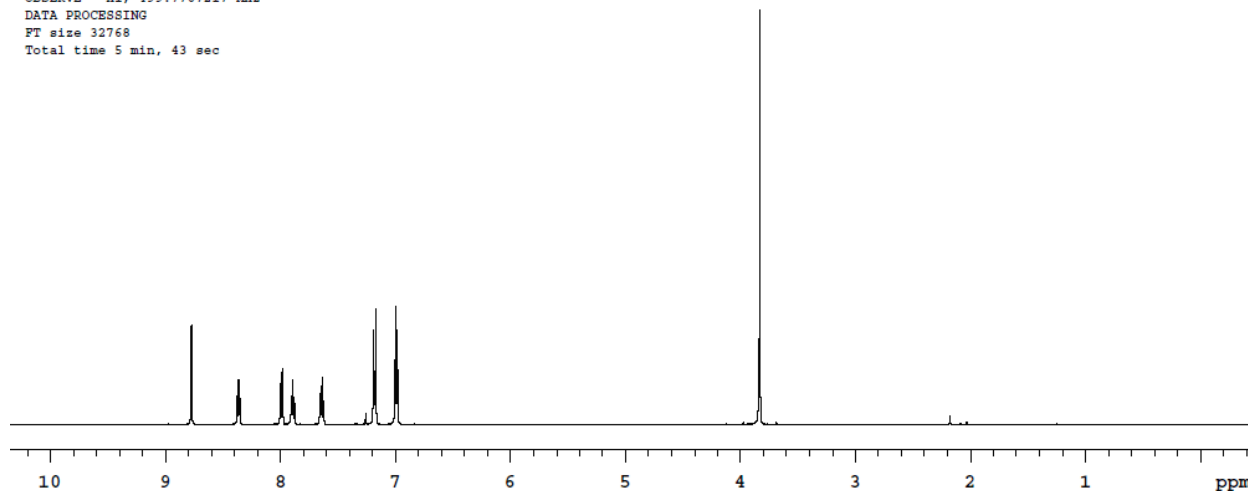



1203-hp-01-037  
Pulse Sequence: s2pul  
Solvent: CDCl3  
Temp. 25.0 C / 298.1 K  
Operator: mkl  
File: 1203-hp-01-037  
INNOVA-500 "riga"

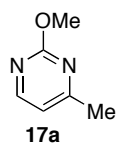

Relax. delay 1.500 sec  
Pulse 57.9 degrees  
Acq. time 1.892 sec  
Width 8000.0 Hz  
64 repetitions  
OBSERVE H1, 499.7707197 MHz  
DATA PROCESSING  
FT size 32768  
Total time 3 min, 37 sec

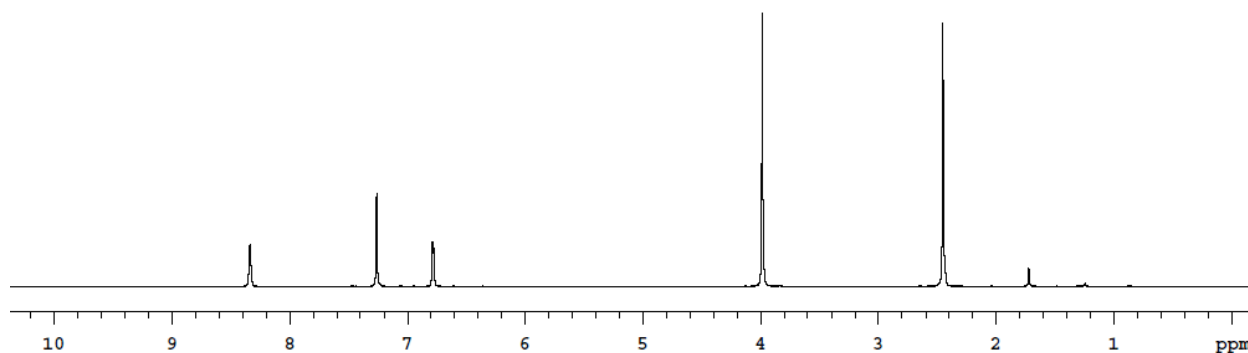

1203-hp-01-038  
Pulse Sequence: s2pul  
Solvent: CDCl3  
Temp. 25.0 C / 298.1 K  
Operator: mkl  
File: 1203-hp-01-038  
INNOVA-500 "riga"

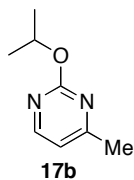

Relax. delay 1.500 sec  
Pulse 57.9 degrees  
Acq. time 1.892 sec  
Width 8000.0 Hz  
64 repetitions  
OBSERVE H1, 499.7707202 MHz  
DATA PROCESSING  
FT size 32768  
Total time 3 min, 37 sec

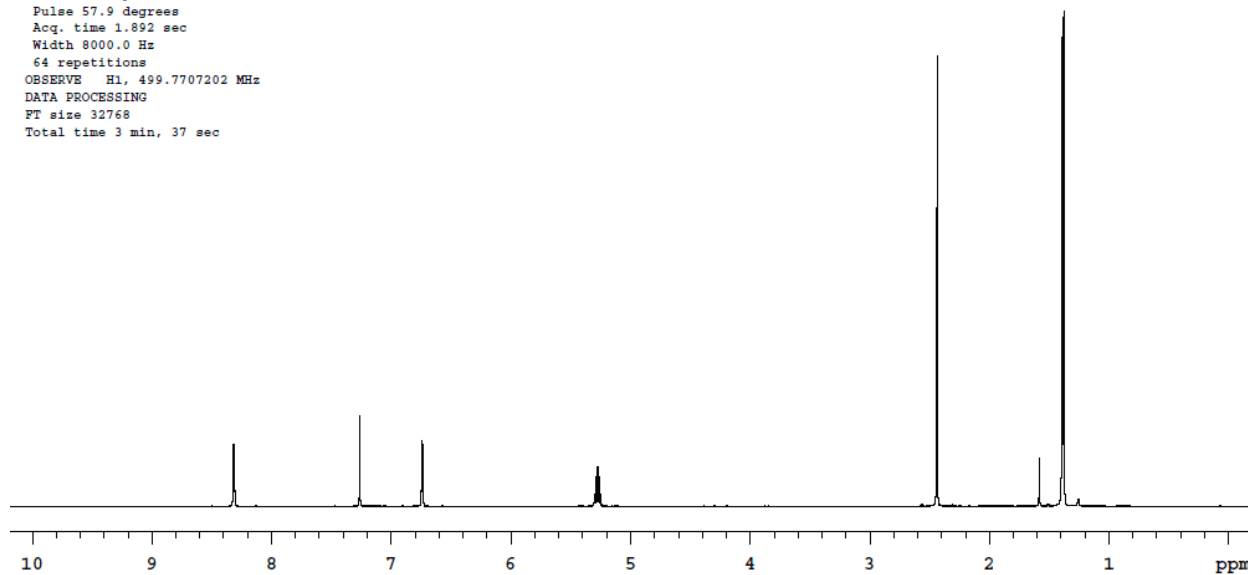

1203-hp-01-039

Pulse Sequence: s2pul  
Solvent: CDCl3  
Temp. 25.0 C / 298.1 K  
Operator: mkl  
File: 1203-hp-01-039  
INNOVA-500 "riga"

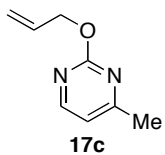

Relax. delay 1.500 sec  
Pulse 57.9 degrees  
Acq. time 1.892 sec  
Width 8000.0 Hz  
60 repetitions  
OBSERVE H1, 499.7707207 MHz  
DATA PROCESSING  
FT size 32768  
Total time 3 min, 37 sec

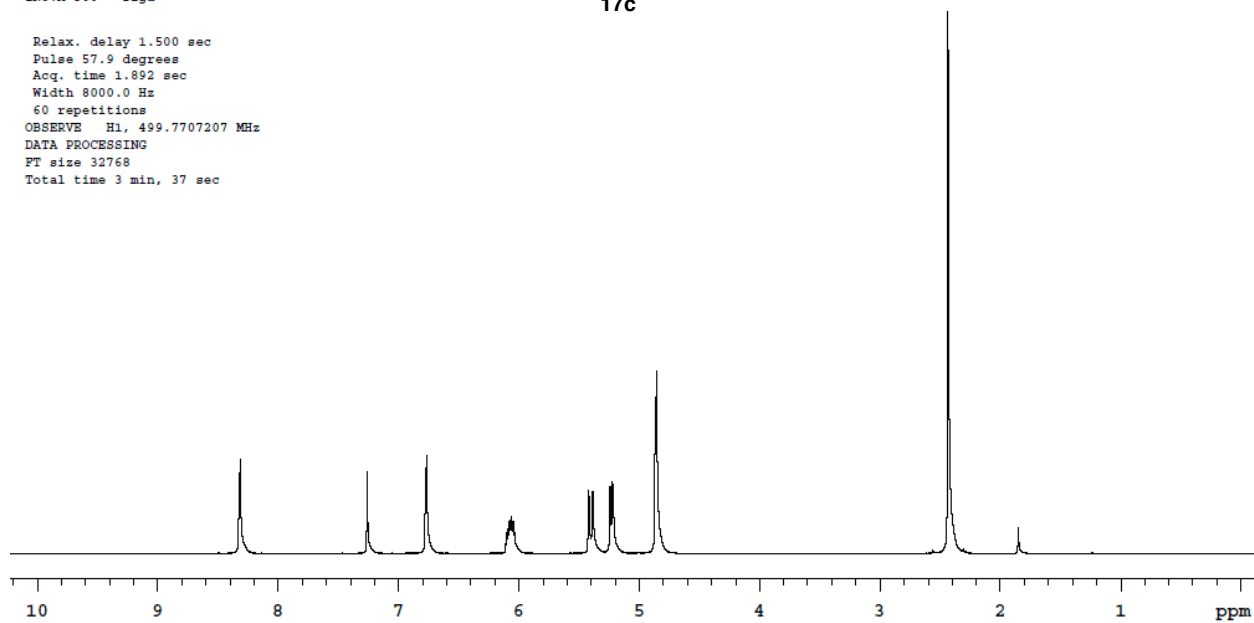

1203-HP-01-053

Pulse Sequence: s2pul  
Solvent: cdcl3  
Temp. 25.0 C / 298.1 K  
Operator: mkl  
File: 1203-HP-01-053  
INNOVA-500 "riga"

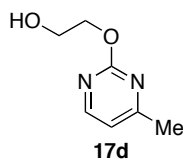

Relax. delay 2.000 sec  
Pulse 45.0 degrees  
Acq. time 1.892 sec  
Width 8000.0 Hz  
80 repetitions  
OBSERVE H1, 499.7707217 MHz  
DATA PROCESSING  
FT size 32768  
Total time 5 min, 43 sec

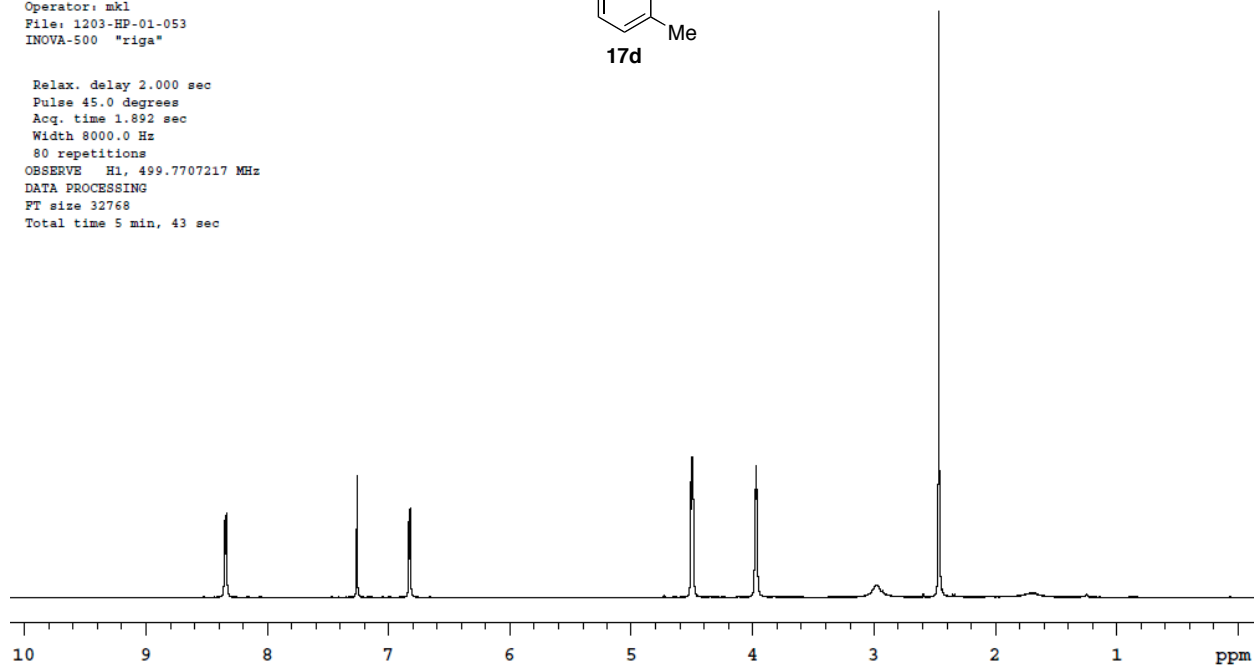

1203-hp-01-041b

Pulse Sequence: s2pul  
Solvent: CDCl3  
Temp. 25.0 C / 298.1 K  
Operator: mkl  
File: 1203-hp-01-041b  
INNOVA-500 "riga"

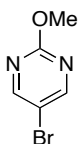

18a

Relax. delay 2.000 sec  
Pulse 57.9 degrees  
Acq. time 1.892 sec  
Width 8000.0 Hz  
4 repetitions  
OBSERVE H1, 499.7707212 MHz  
DATA PROCESSING  
FT size 32768  
Total time 0 min, 15 sec

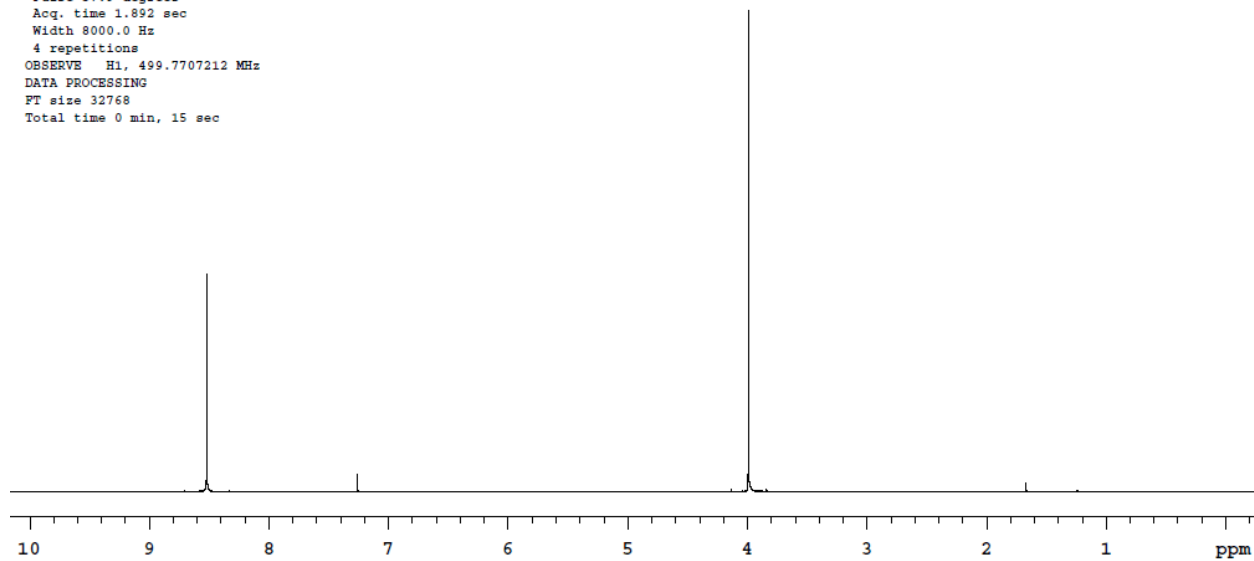

1203-hp-01-042

Pulse Sequence: s2pul  
Solvent: CDCl3  
Temp. 25.0 C / 298.1 K  
Operator: mkl  
File: 1203-hp-01-042  
INNOVA-500 "riga"

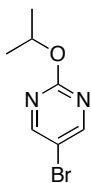

18b

Relax. delay 2.000 sec  
Pulse 57.9 degrees  
Acq. time 1.892 sec  
Width 8000.0 Hz  
24 repetitions  
OBSERVE H1, 499.7707212 MHz  
DATA PROCESSING  
FT size 32768  
Total time 4 min, 9 sec

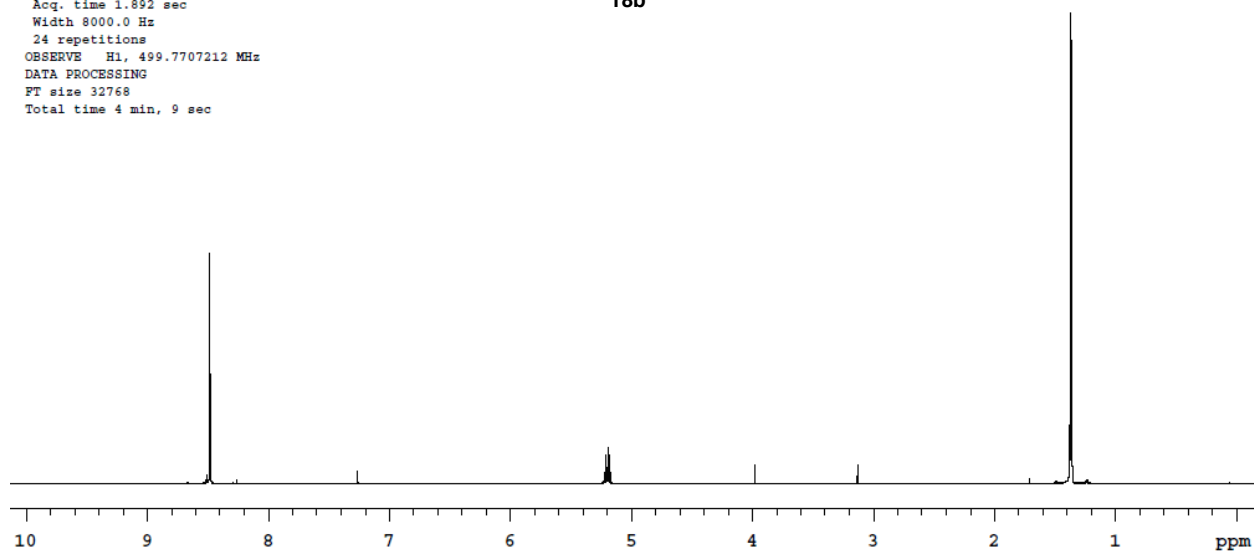

1203-hp-01-043  
Pulse Sequence: s2pul  
Solvent: CDCl3  
Temp. 25.0 C / 298.1 K  
Operator: mkl  
File: 1203-hp-01-043a  
INNOVA-500 "riga"

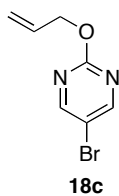

Relax. delay 1.500 sec  
Pulse 57.9 degrees  
Acq. time 1.892 sec  
Width 8000.0 Hz  
32 repetitions  
OBSERVE H1, 499.7707217 MHz  
DATA PROCESSING  
FT size 32768  
Total time 3 min, 37 sec

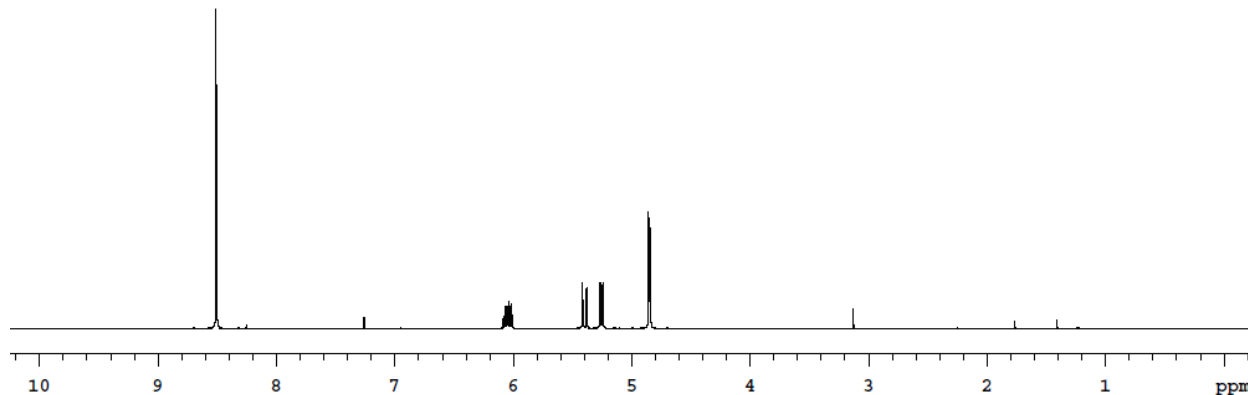

1203-HP-01044b1  
Pulse Sequence: s2pul  
Solvent: cdcl3  
Temp. 25.0 C / 298.1 K  
Operator: mkl  
File: 1203-HP-01044b1  
INNOVA-500 "riga"

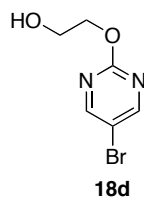

Relax. delay 2.000 sec  
Pulse 45.0 degrees  
Acq. time 1.892 sec  
Width 8000.0 Hz  
32 repetitions  
OBSERVE H1, 499.7707217 MHz  
DATA PROCESSING  
FT size 32768  
Total time 2 min, 4 sec

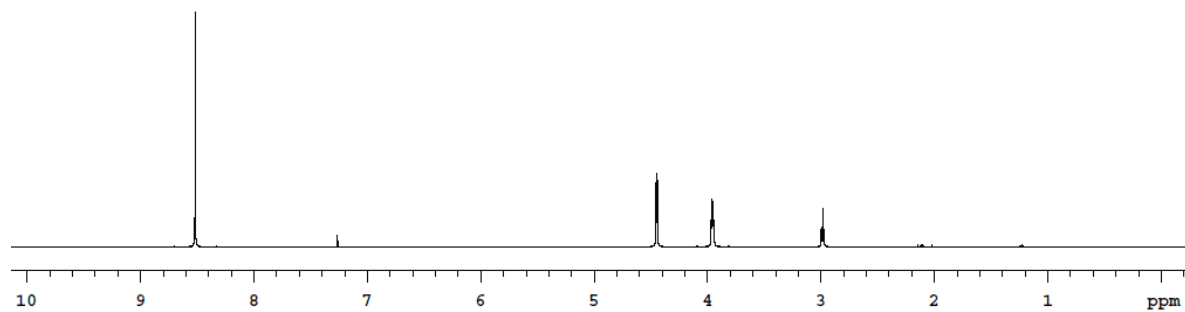

1203-HP-01-061-1h

Pulse Sequence: s2pul  
Solvent: cdcl3  
Temp. 25.0 C / 298.1 K  
Operator: mkl  
File: 1203-HP-01-061-1h  
INNOVA-500 "riga"

Relax. delay 2.000 sec  
Pulse 45.0 degrees  
Acq. time 1.892 sec  
Width 8000.0 Hz  
48 repetitions  
OBSERVE H1, 499.7707217 MHz  
DATA PROCESSING  
FT size 32768  
Total time 5 min, 43 sec

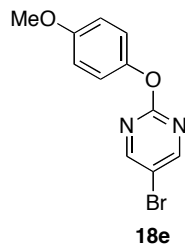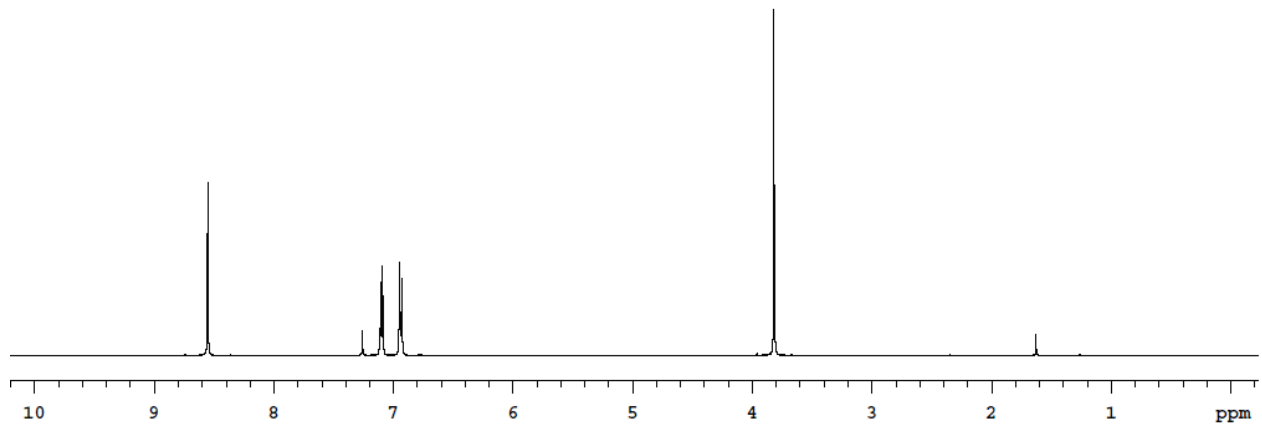



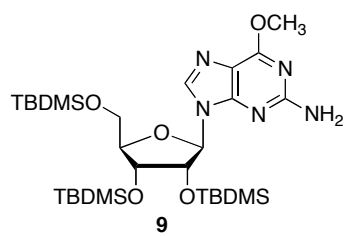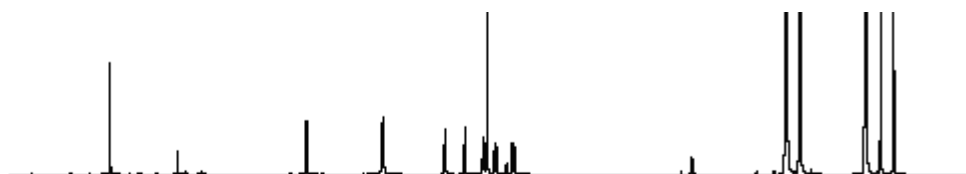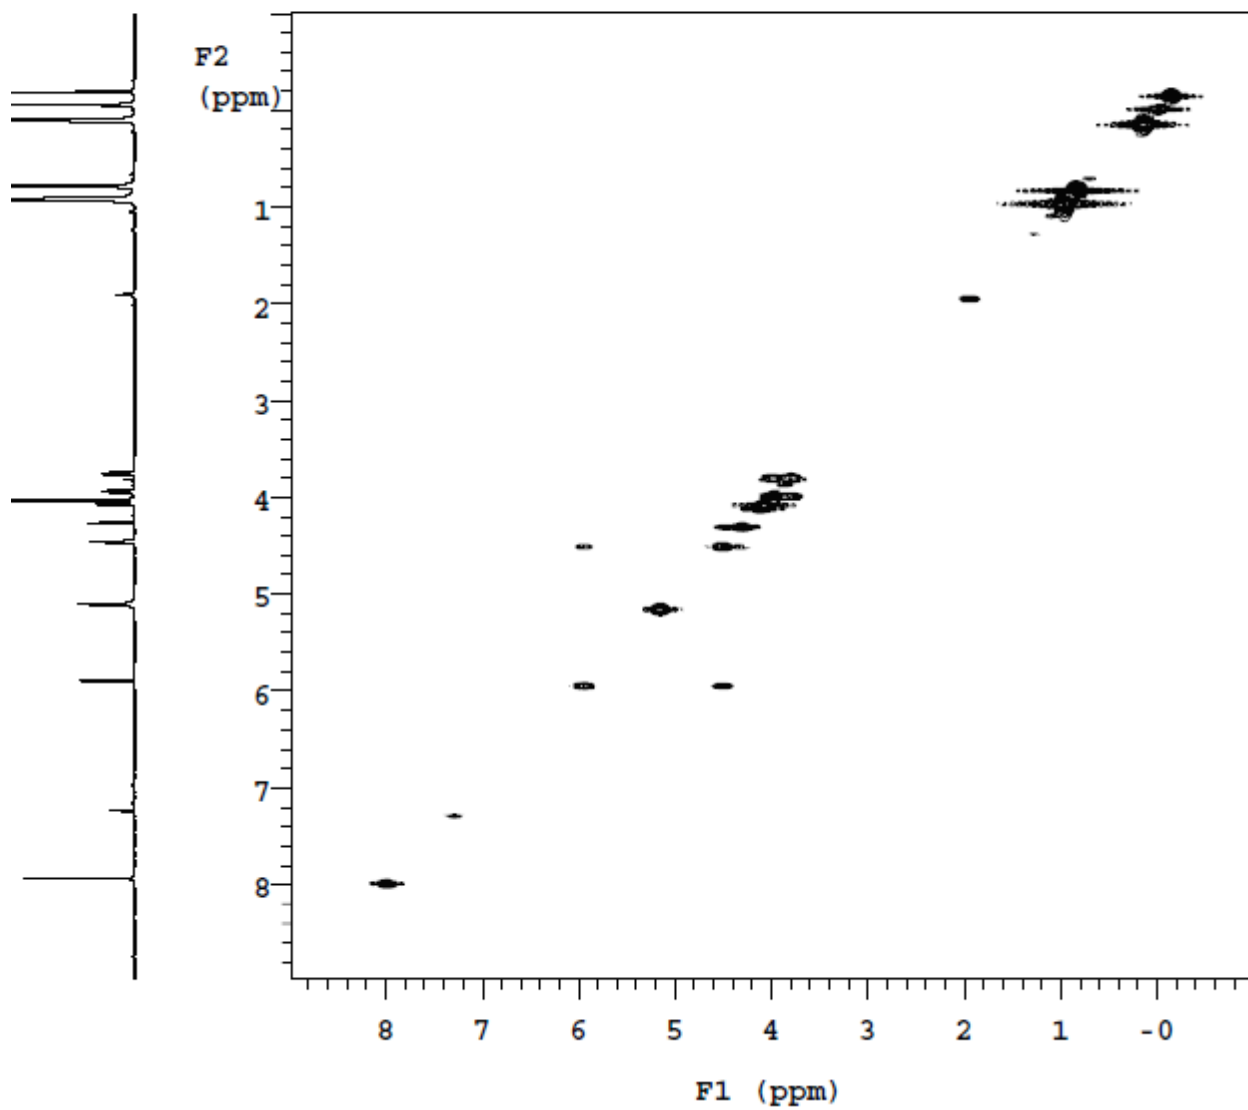

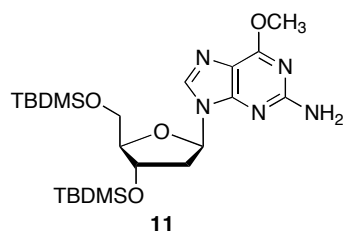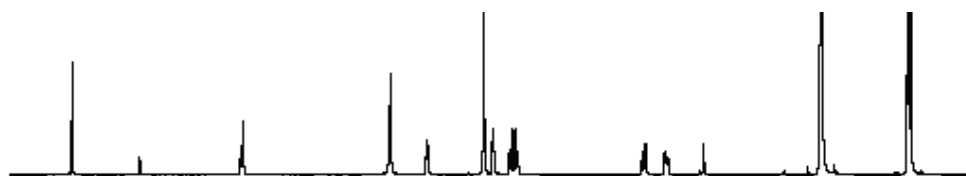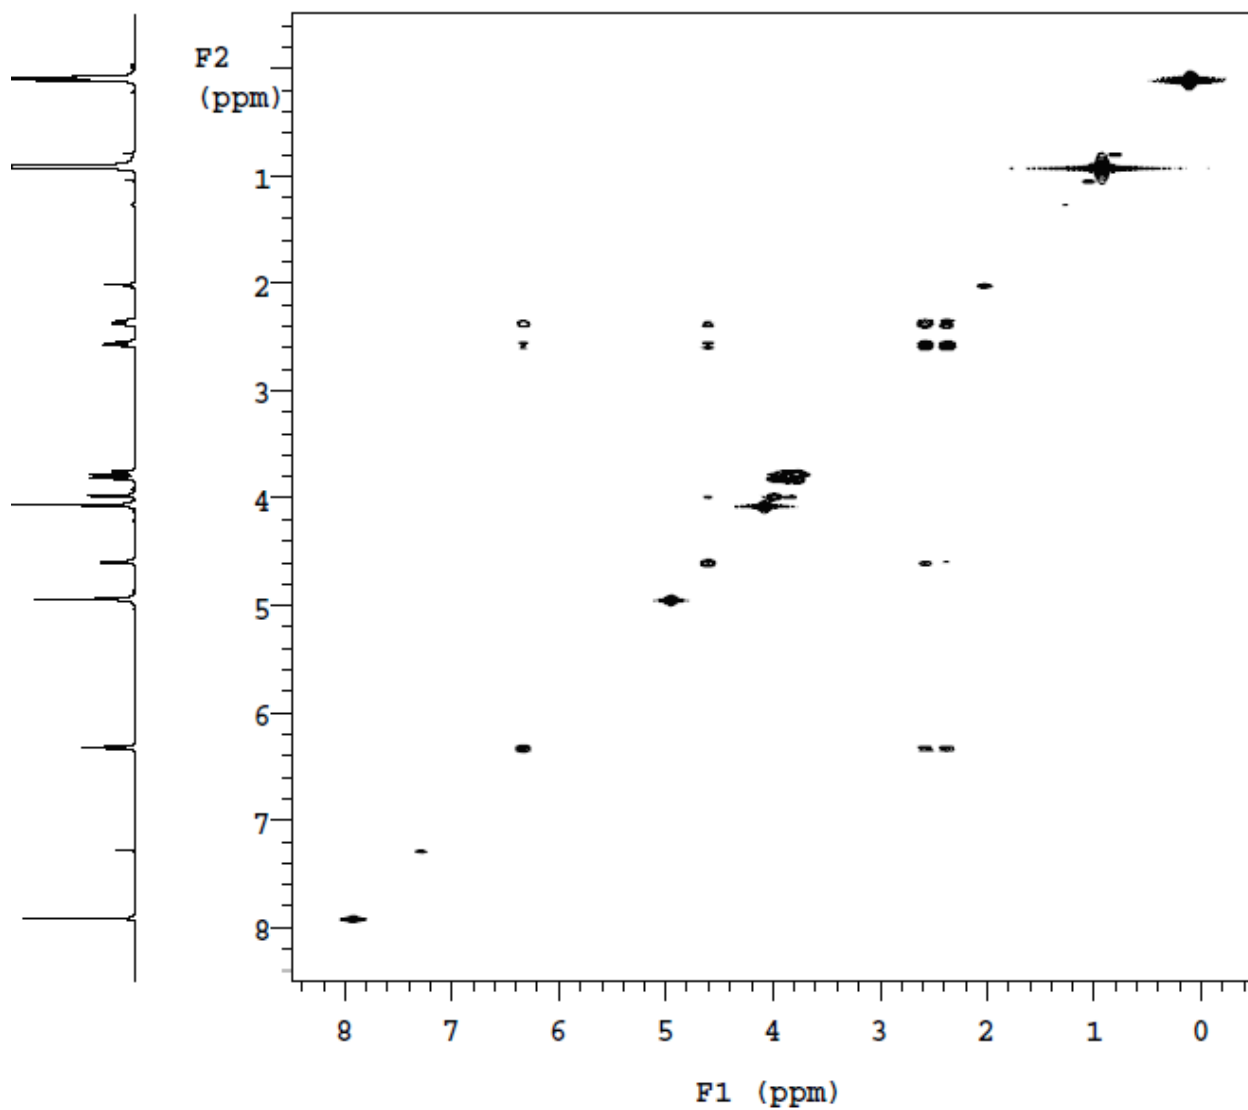



## References

- (1) Bae, S.; Lakshman, M. K. *J. Am. Chem. Soc.* **2007**, *129*, 782–789.
- (2) Lakshman, M. K.; Frank, J. *Org. Biomol. Chem.* **2009**, *7*, 2933–2940.
- (3) Štefane, B.; Polanc, S. *Synlett* **2008**, 1279–1282.
- (4) Bogert, M. T.; May, C. E. *J. Am. Chem. Soc.* **1909**, *31*, 507–513.
- (5) Adachi, K. *Yakugaku Zasshi* **1955**, *75*, 1426–1429.
- (6) Ranganathan, D.; Rathi, R.; Keshavan, K.; Singh, W. P. *Tetrahedron* **1986**, *42*, 4873–4878.
- (7) Mantell, S. J.; Gibson, K. R.; Osborne, S. A.; Maw, G. N.; Rees, H.; Dodd, P. G.; Greener, B.; Harbottle, G. W.; Million, W. A.; Poinard, C.; England, S.; Carnell, P.; Betts, A. M.; Monhemuis, R.; Prime, R. L. *Bioorg. Med. Chem. Lett.* **2009**, *19*, 2190–2194.
- (8) Miyashita, A.; Matsuda, H.; Lijima, C.; Higashino, T. *Chem. Pharm. Bull.* **1992**, *40*, 43–48.
- (9) Wan, Z.-K.; Wacharasindhu, S.; Levins, C. G.; Lin, M.; Tabei, K.; Mansour, T. S. *J. Org. Chem.* **2007**, *72*, 10194–10210.
- (10) Marshall, J. R.; Walker, J. *J. Chem. Soc.* **1951**, 1004–1017.
- (11) Nara, S. J.; Jha, M.; Brinkhorst, J.; Zemanek, T. J.; Derek A. Pratt, D. A. *J. Org. Chem.* **2008**, *73*, 9326–9333.
- (12) Arukwe, J.; Keilen, G.; Undheim, K. *Acta Chem. Scand.* **1988**, *B42*, 530–536.
- (13) Falck-Pedersen, M. L.; Benneche, T.; Undheim, K. *Acta Chem. Scand.* **1989**, *43*, 251–258.
- (14) Bardhan, S.; Wacharasindhu, S.; Wan, Z.-K.; Mansour, T. S. *Org. Lett.* **2009**, *11*, 2511–2514.
